# Supplementary material for: Unique molecular and functional features of extramedullary hematopoietic stem and progenitor cell reservoirs in humans
Source: PubMed Central journal article supplement (PMC7612845; doi:10.1182/blood.2021013450), 2022-06-09
Supplement: EMS145429-supplement-Supplementary_Material.pdf [file EMS145429-supplement-Supplementary_Material.pdf]

**Supplemental data for Mende et al.**

- Supplemental methods
- Supplemental note 1
- Supplemental tables 1-9
- Supplemental figures 1-9
- References for supplemental data

## SUPPLEMENTAL METHODS

### Sample preparation

For isolation of mononuclear cells (MNCs) from BM and PB taken by venipuncture (ET,  $\beta$ -thalassemia patients, and healthy controls), samples were diluted 1:1 in PBS prior to density gradient centrifugation on Pancoll (PAN-Biotech) or on LymphoPrep (Axis-Shield). The MNC fraction was collected, and red blood cells were lysed in RBC lysis buffer (BioLegend) or Ammonium Chloride Solution (Stem cell Technologies) for 15 min at 4 °C. PB from leukoreduction filters was lysed twice by incubation with RBC lysis buffer for 5 min at 4 °C, followed by density gradient centrifugation and MNC harvest. Freshly collected spleen samples (OD spleen and HS spleen) were immediately placed into 4°C UW solution and kept up to 12 hours at 4°C until processing. Cell suspensions were obtained by placing small sections of spleen (<5 mm<sup>3</sup>) with cold phosphate buffer into a benchtop gentleMACS™ dissociator (Miltenyi Biotec). Then, MNCs were enriched through density gradient separation followed by red cell lysis. For some samples, CD34<sup>+</sup> selection was performed prior to freezing using the CD34 MicroBead Kit (Miltenyi Biotec) and manual separation on LS columns. MNC and CD34<sup>+</sup> cell suspensions were frozen in FBS/10% DMSO and stored at -150 °C until use. Prior to flow cytometry, frozen MNCs or CD34<sup>+</sup> enriched cells were thawed by drop wise addition of pre-warmed IMDM (Life Technologies) + 0.1 mg/ml DNase (Worthington) + 50% Fetal Bovine Serum (FBS, Life Technologies). If required, magnetic CD34<sup>+</sup> selection from thawed MNCs was performed as described above.

### Flow cytometry

All antibodies are listed in Table S6 and detailed antibody panels can be found below. Cells were stained for 20 min at room temperature (RT) in the dark using antibodies diluted in PBS + 3% FBS (PBS/FCS), followed by two washes in PBS/FCS. For cell cycle analysis, cell surface marker stained samples were fixed in Cytofix/Cytoperm, followed by two washing steps in Perm/Wash according to the manufacturer's protocol (BD). Intranuclear staining was performed at 4 °C overnight in the dark using the FITC anti-human Ki-67 antibody (BD) diluted in Perm/Wash. The next day, DNA content was stained by 20 min incubation in 0.5 µg/ml DAPI (BioLegend) in Perm/Wash at RT, followed by one wash with Perm/Wash. Prior to flow cytometry, all samples were resuspended in PBS/FBS and filtered through a 20 µm cell strainer.

For CITE-seq<sup>1</sup> of OD3 (BM), OD4 (BM and spleen), mPBs and HS spleen, CD34<sup>+</sup> cells were resuspended at a concentration of  $1 \times 10^6$  cells / 50 µl PBS/FBS and blocked with

5  $\mu$ l Human TruStain FcX™ Fc Blocking Reagent (BioLegend) for 10 min at 4 °C. In parallel, customized lyophilized TotalSeq™-A antibodies (BioLegend, Table S7) were reconstituted in 50  $\mu$ l PBS/FBS following the manufacturer's protocol. Reconstituted TotalSeq™-A antibodies were added at a concentration of 50  $\mu$ l antibody mix /  $1 \times 10^6$  cells and incubated for 30 min at 4 °C. Simultaneously, cells were stained with HSPC antibody panel (E). After three washes with PBS/FBS, cells were resuspended in PBS/FBS and filtered for flow cytometry.

Samples were sorted or analyzed at the NIHR Cambridge BRC Cell Phenotyping Hub using the BD FACSAria Fusion and FACSAria III sorters or BD LSRII and LSRFortessa cytometer, respectively. Single-cell sorts were performed using single-cell purity and index-sorting modes, while purity mode was chosen for bulk sorts. The average sort purity was >95%. High-throughput analysis was performed using the BD High Throughput Sampler (HTS). Data were analyzed using FlowJo software v9.9 or v10 (Tree Star).

### **Antibody panels**

Clone, supplier, and catalogue number for each antibody can be found in Table S6. Antibody panels A-F were used to sort and phenotype subsets of hematopoietic stem and progenitor cells. Panel (A): CD19/BV785, CD34/APC-Cy7, CD38/PE-Cy7, CD90/APC, CD45RA/A700, CD49f/PE-C5, CD10/BV421, CD71/FITC, CD117/BV650, CLEC9A/PE, Zombie Aqua; Panel (B): CD19/BV785, CD34/APC-Cy7, CD38/PE-Cy7, CD90/APC, CD45RA/A700, CD49f/PE-C5, CD41a/BV510, CD71/FITC, CD117/BV650, CLEC9A/PE, Zombie UV; Panel (C): CD45RA/FITC, CD90/PE or CD90/APC, CD49f/PE-Cy5, CD38/PE-Cy7, CD10/APC or CD10/BV421, CD19/A700, CD34/APC-Cy7, CD7/BV421, Zombie Aqua; Panel (D): CD19/BV785, CD34/APC-Cy7, CD38/PE-Cy7, CD36/APC, CD45RA/A700, CD71/PerCP-Cy5.5, GlyA/BV421, CD90/FITC, CD45/BV605, CD135/PE, Zombie Aqua. Panel (E): CD71/FITC, CD90/PE, CD38/PE-Cy7, CD45RA/A700, CD34/APC-Cy7, CD49f/PE-Cy5, CD41a/BV510 or Zombie Aqua, CD19/BV785 or CD123/BV785, CD105/BV650, Zombie UV. In some cases, a CD36/APC, CD41/APC or CD135/A647 antibody was added to the staining in panel (E). In other cases, CD90/PE was replaced by CD90/APC, CD45RA/A700 was replaced by CD45RA/BV421 and a CD135/PE or CD71/PE or CD71/BV650 antibody was added. Panel (F): CD3/FITC, CD5/PE, CD49f/PE-Cy5, CD34/APC-Cy7, CD38/PE-Cy7, CD90/APC, CD45RA/A700, Streptavidin/BV510 (BioLegend, dilution 1:400), Zombie UV. After exclusion of dead cells based on Zombie dyes (BioLegend), HSPCs populations were defined as previously described: total HSPC pool (CD19<sup>-</sup>CD34<sup>+</sup>), phenotypic HSC/MPPs

(CD19<sup>-</sup>CD34<sup>+</sup>CD38<sup>-</sup>CD45RA<sup>-</sup>), CMP/MEPs (CD19<sup>-</sup>CD34<sup>+</sup>CD38<sup>+</sup>CD45RA<sup>-</sup>CD10/CD7<sup>-</sup>), MEPs (CD19<sup>-</sup>CD34<sup>+</sup>CD38<sup>+</sup>CD45RA<sup>-</sup>CD123<sup>-</sup>), E-MEPs (CD19<sup>-</sup>CD34<sup>+</sup>CD38<sup>+</sup>CD45RA<sup>-</sup>CD123<sup>-</sup>CD71<sup>+</sup>).

For cell cycle analysis, panel (G) or (H) were used. Panel (G): CD45RA/PE, CD90/APC, CD49f/PE-Cy5, CD38/PE-Cy7, CD10/BV421, CD19/A700, CD34/APC-Cy7, CD7/BV421, KI-67/FITC, DAPI. Panel (H): CD19/APC-Fire750; CD34/APC, CD38/PE-Cy7, CD45RA/PE, CD71 /PerCP-Cy5.5, CD123/BV785, KI-67/FITC, DAPI. Colonies from My, Ly, Ery and Meg single-cell differentiation assays were stained with Panel (I): CD45/PE-Cy5, CD41/FITC, CD11b/APC-Cy7, CD14/PE-Cy7, CD15/BV421, GlyA/PE, CD56/APC or (J): CD45/PE-Cy5, CD71/FITC, CD11b/APC-Cy7, CD14/PE-Cy7, CD15/BV421, GlyA/PE, CD56/APC, CD41/BV510. Colonies from single-cell Ery/Meg differentiation assays were stained with panel (K) CD71/FITC, GlyA/PE, CD45/PE-Cy5, CD14/PE-Cy7, CD42b/APC, CD11b/APC-Cy7, CD15/BV421, CD41a/BV510.

At the time point of final analysis, mouse bone marrow was stained with antibody panel (L): GlyA/PE, CD19/FITC, CD45/PE-Cy5, CD14/PE-Cy7, CD33/APC, CD19/A700, CD45/BV510, CD3/APC-Cy7; or panel (M): GlyA/PE-Cy7, CD19/FITC, CD71/PE, CD45/PE-Cy5, CD14/APC-Cy7, CD33/APC, CD19/A700, CD45/BV510.

### **Index-sorting analysis**

Principal component analysis (PCA) of single-cell indexed surface marker expression, recorded as .csv file during FACS sorting, was performed with R (version 3.4.0 or above) as previously described<sup>2</sup>. In brief, data collected from different sorts occurring on different days was normalized using the pipeline established in<sup>3</sup>. Therefore, data from individual experiments were logicle transformed using the estimateLogicle function ( $m = 4.5$ ) of the FlowCore package and were then normalized with the ComBat function from the sva package. Next, principal component analysis on the normalized data was performed using the prcomp function. The prcomp rotation variable was used to obtain vector loadings.

### **Mass cytometry**

Three independent LD-PB donors were used for mass cytometry experiments. Staining for heavy metal labeled antibodies (Table S8, purchased from Fluidigm or labeled using Maxpar antibody labeling kit) was performed using the manufacturer's reagents and protocol (Fluidigm). Briefly, cells were washed once with PBS and stained with 1  $\mu$ M Cell-ID Cisplatin for 15 min at RT to exclude dead cells. Cells were

fixed with MaxPar Fix I buffer and stained with biotinylated antibodies labeling lineage positive cells (Lin: CD2, CD3, CD4, CD7, CD8, CD10, CD11b, CD14, CD19, CD20, CD56, CD235a) in 100  $\mu$ l of cell staining buffer for 30 min at RT. Cells were washed with MaxPar cell stain buffer and stained with heavy-metal labeled surface marker antibodies, including a heavy-metal labeled anti-biotin secondary antibody, in 100  $\mu$ l of cell staining buffer for 1 h at 4°C. Cells were washed twice and permeabilized with 1 mL of methanol for 25 min at 4°C. Cells were then stained with heavy-metal labeled cytoplasmic and nuclear antibodies in 100  $\mu$ l of cell staining buffer for overnight at 4°C, washed and resuspended in 1ml of intercalation solution containing Cell-ID Intercalator-Ir for 1hr at RT, washed and resuspended in Maxpar water for data acquisition on Helios (Fluidigm). After gating of the indicated populations in the Cytobank software (Fluidigm), raw data of signal intensity was exported and data was processed in R (v3.4.0). First, the median of signal intensities in each channel was computed for each population. Next, heatmaps were generated using the gplots package heatmap.2 function, whereby data was scaled based on channel intensities.

### **Library preparation using the Smart-seq2 protocol**

The Smart-seq2 protocol was used for sequencing of i) single phenotypic HSC/MPPs from OD BM, spleen and PB, ii) single CD71<sup>+</sup> HSC/MPPs from LD-PB and iii) for minibulk (20 cells) sequencing of CD71<sup>-</sup> and CD71<sup>+</sup> HSC/MPPs from LD-PB. Library preparation was adapted from the Smart-seq2 protocol of <sup>4</sup>. Individual cells (or 20 cells for minibulk sequencing) were directly sorted into 4  $\mu$ l of lysis buffer (0.22% (v/v) Triton X-100, 11.5 U/ $\mu$ l RNase inhibitor (Clontech), 5 mM DTT, 1 mM dNTP in nuclease-free water (Ambion, Life Technologies)) per well of 96-well PCR plates. Plates were spun down immediately after sort and stored at -80 °C until library preparation. Plates were thawed on ice and 10  $\mu$ M OligodTs (Sigma) and ERCCs at a final concentration of 1:30,000,000 (Ambion, Life Technologies) were added, followed by annealing for 3 min at 72 °C. Next, reverse transcription was carried out using 50 U/well SmartScribe (SmS) RT enzyme (Takara) + 1x SmS First Strand buffer (Takara) + 5  $\mu$ M TSO (Qiagen). Amplification of cDNA (22 amplification cycles) was performed using 0.55  $\mu$ M ISPCR primers (Sigma) and 1 x KAPA HiFi Hotstart mix (Roche). After purification of the PCR product with a 1: 0.6 ratio of PCR product to AMPure XP beads (Beckman Coulter), the success of cDNA preparation was confirmed using a 2100 Bioanalyzer with High-sensitivity DNA chip (Agilent). Illumina library preparation with the Nextera XT DNA Library Prep Kit (Illumina) was carried out following manufacturer's instructions. Size distribution of the libraries was analyzed on a High-sensitivity DNA chip (Agilent) and the concentration of indexed libraries was quantified following the

protocol of the KAPA library quantification kit (Kapa Biosystems). For each organ donor (OD), the libraries from all tissues (containing 380 - 464 cells) were combined prior to sequencing and sequenced on the Illumina HiSeq 4000 system in 2 lanes. For OD1 only BM and spleen phenotypic HSC/MPPs were sequenced using this method, for OD2 phenotypic HSC/MPPs from all three tissues were sequenced using Smart-seq2 (see Table S9). The library from 192 single CD71<sup>+</sup> LD-PB HSC/MPPs was sequenced on 2 lanes of the Illumina HiSeq 4000 system. For minibulk sequencing of CD71<sup>-</sup> and CD71<sup>+</sup> HSC/MPPs from LD-PBs all samples (32 pools of 20 cells) were combined prior sequencing on 2 lanes of the Illumina HiSeq 4000 system.

### **Smart-seq2 analysis**

Resulting reads from each OD were independently aligned and mapped against Ensembl genes (release 81) <sup>5</sup> using GSNAP (version 2015-09-29) <sup>6</sup> and quantified using HTSeq (version 0.6.0) <sup>7</sup>. Quality control filters were applied rejecting cells with less than 50,000 (OD1) or 200,000 (OD2) reads mapping to nuclear genes which in turn had to be at least 10% of the mapping reads in the cell. Additionally, the maximum allowed fraction of cells mapping to mitochondrial genes was set at 20%. The levels of technical variance were estimated using the ERCC spike-ins as described by <sup>8</sup> with highly variable genes (HVGs) being defined as having the squared coefficient of variation exceeding technical noise. Prior to differential gene expression analysis, the Smart-seq2 data filtered count matrices from both donors were combined and HVGs again were determined as described for the individual donors above. Principal component analysis (PCA) was calculated on the HVGs and the cells falling outside the upper and lower limits of the boxplot for the three first principal components were removed as outliers (Table S9). Differential expression tests were performed using the R packages DESeq2 <sup>9</sup> with donor identity preserved as a covariate in the design matrix. The batch correction method Combat, was then applied as described in <sup>10</sup> after which the HVG set was recomputed, using the method described in <sup>11</sup>. This recomputed HVG set was then subsequently used to recompute PCA and the first two components plotted.

Reads obtained from the single CD71<sup>+</sup> HSC/MPP cells were processed and filtered through the same procedure described above up to resulting in a counts table that was later further processed to project against a HSC/MPP cells reference (described in methods below).

Analysis of the minibulk data from CD71<sup>-</sup> and CD71<sup>+</sup> HSC/MPPs was performed as follows. After alignment to the human reference using GSNAP and quantification with HTseq, quality control (QC) was performed for the resulting read counts using the

bglab package (<https://github.com/wjawaid/bglab>) on R v3.4.0 (or higher). All samples passed quality control and had  $>2 \times 10^5$  reads mapped to a gene feature. Technical replicates clustered together by PCA. Prior to further analysis, read counts of technical triplicates were summed and treated as one sample for all following steps. Data were normalized for sequencing depth using size factor calculated on ERCCs spike-in genes<sup>12</sup>. Highly variable genes (HVGs) were selected with the techVar function of the bglab package, setting the MeanForFit parameter at  $10^8$ . PCA was performed on the 184 detected HVGs using the runPCA function (bglab package). To determine differential gene expression between CD71<sup>-</sup> and CD71<sup>+</sup> HSC/MPPs with DESeq2, the doDESeq wrapper function of the bglab package was used<sup>9</sup>.

### **Library preparation using the 10x Genomics platform**

Cells resuspended in 47  $\mu$ l PBS + 0.04% BSA were immediately processed for single-cell sequencing using the Chromium™ Single Cell 3' Library & Gel Bead Kit v2 (OD1, OD2) and v3 (OD3, OD4, all living donor PBs - LD-PBs 1-6, G-CSF mobilized PB – mPB 1-4, Hereditary Spherocytosis spleens – HS1-2) (10x Genomics) following the manufacturer's protocols. RNA and cell surface protein libraries were generated following the manufacturer's protocols (10x Genomics and BioLegend, respectively). For some samples, pools of cells from multiple donors (mPB1+mPB2; mPB3+mPB4; HS1+HS2) were combined and processed together during library prep. Following sequencing, donors were demultiplexed using SNP information from the resulting data with the soupourcell<sup>13</sup> software pipeline.

For each OD, the libraries from all three tissues were combined prior to sequencing and sequenced on the Illumina HiSeq 4000 system in 2 (OD1) or 3 lanes (OD2). For all LD-PB samples, the libraries from 2 or 3 donors were combined and sequenced in 1-2 lane on the Illumina NovaSeq 6000 system. For CITE-seq of OD3 and OD4, as well as the mPB and HS spleen samples, libraries were sequenced on the Illumina NovaSeq 6000 system, aiming for a minimum of 20,000 reads per cell for gene expression and 5,000 reads per cell for cell surface protein.

The resulting scRNA-seq reads were aligned to the GRCh37 (hg19) reference genome and quantified using cellranger count (CellRanger pipeline versions 2.1.1 [OD1-2]; 3.1.0 [OD3-4, LD1-6]; or version 6.0.1 [mPB1-4, HS1-2]), giving a cell recovery of 31-60% for each donor and tissue (Table S9 for the number of cells passing quality control). Multiplets were estimated using the scrublet Python package<sup>14</sup> and subsequently removed.

### **10x scRNA-seq data - Filtering**

For all donors, further gene and cell filtering was applied to the 10x scRNA-seq datasets, either independently or as combined datasets. Genes being expressed in fewer than 3 cells and cells expressing fewer than 500 genes or cells with 10% (mPB3, mPB4, HS1, HS2), 15% (mPB1, mPB2) or 20% (OD1-4, LD PB 1-6, unless otherwise stated) or more of its expressing genes being mitochondrial were excluded. Thresholds were chosen based on visual inspections of feature distributions. These filtering steps were applied resorting to Scanpy Python package<sup>15</sup> inbuilt filtering methods. The subsequent analyses pipeline is summarized in supplemental Figure 10.

### **10x scRNA-seq data – Normalization**

The filtered count matrices from OD-BM, OD-spleen, OD-PB and LD-PB data were combined into an anndata object using the Scanpy<sup>15</sup> Python package. This combined dataset was then log-normalized and its HVGs determined using the inbuilt package methods, into what is hence referred here as the *multitissue base normalized dataset*. The filtered counts matrices from the (four) mPB and (two) HS samples were also combined into two respective datasets as described in the next section and processed, as above, into log-normalized datasets (supplemental Figure 10).

### **10x scRNA-seq data - Seurat3 integration**

Three different data integrations were performed using the Seurat (version 3) R package<sup>16</sup> : 1) integration of OD-BM, OD-spleen, OD-PB and LD-PB samples in a *multitissue seurat integrated dataset*; 2) integration of OD-spleen (OD1,2,4) and HS-spleen (HS1,2) in an *integrated spleen dataset* and 3) OD1-4 BM and all PB samples (OD1, OD2, OD4, LD1-6, mPB1-4) to create the *integrated mobilized peripheral blood dataset* (supplemental Figure 10).

The filtered count matrix from each dataset was independently normalized and had its HVGs determined<sup>11</sup>. Subsequently, integration was performed using 3,000 anchors found using the first 15 dimensions from the canonical correlation analysis. Following the integration, the data was scaled and dimensionality reductions were calculated, resulting in what is hence called the *multitissue seurat integrated dataset*, the *integrated spleen dataset* and the *integrated mobilized peripheral blood dataset*.

To verify that similar results could be obtained with a different method, in parallel, we also applied ComBat correction<sup>10</sup> (as implemented in Scanpy) to the *multitissue base normalized dataset*. This yielded a similar landscape with similar cluster identities and proportions (supplemental Figure 3G-H).



### **CITE-seq cell surface protein data analysis**

Cell surface protein data was analyzed for OD3 (spleen) and OD4 (BM, spleen) as described in <sup>17</sup>. Cell surface protein data was quantified using CITE-seq-Count (version 1.4.3). Cells with total counts higher than 5,000, or fewer than 30 antibodies, or antibodies expressed in fewer than 3 cells were removed from downstream analysis. Raw protein count matrices underwent correction for cell-to-cell variation via normalization using the DSB (Denoised and Scaled by Background) algorithm <sup>18</sup>. DSB normalization quantified protein counts above background levels in individual cells and allowed for improved interpretability of protein expression. The dimensionality reduction techniques applied were the ones implemented on the 10x data. PCA, UMAP and Force Directed Graph (FDG) visualization were performed as below and DSB normalized expression values were plotted on the UMAP coordinates and on a heatmap. FDG was used for illustrating cell density. For batch correction of the cell surface protein data ComBat was used to integrate all donors. Finally, Leiden clustering was performed, and clusters were annotated using differential expression of known surface markers.

### **10x data - Dimensionality reduction and visualization**

The dimensionality reduction techniques applied to the analysis datasets (supplemental Figure 10) were the ones implemented in the Scanpy package, with the exception for the *multitissue seurat integrated dataset* in which the implementations within the Seurat3 package were used. Specifically, these techniques were PCA, diffusion maps<sup>19</sup> and uniform manifold approximation and projection (UMAP)<sup>20</sup>. In addition, the ForceAtlas2 force-directed graph (FDG) algorithm<sup>21</sup> was applied to the k-nearest neighbor graph of the datasets to also provide further embeddings. Furthermore, the PCA coordinates generated for the *multitissue seurat integrated dataset* were imported to the *multitissue base normalized dataset* and used to compute the nearest neighbor's graph in this dataset before further downstream analysis.

### **10x data - Clustering**

Cell communities (henceforth clusters) were defined via the Leiden algorithm (as implemented in Scanpy) at several resolutions. Silhouette plots and respective scores were calculated in order to evaluate and select which resolution to proceed with. All clustering resolutions yielded similar proportions of the four major hematopoietic lineage branches. Leiden resolution 1.2 was chosen for all further analyses downstream of the *multitissue base normalized dataset* as it yielded the best granularity within each branch and high silhouette scores. No clustering was performed

on the *integrated spleen dataset* and the *integrated mobilized peripheral blood dataset*. Instead, cells were annotated by transfer of the cluster labels from the *multitissue seurat integrated dataset* (supplemental Figure 10, see methods below).

### **Differential expression**

Differential expression tests (Table S3) were performed on raw counts using the R packages DESeq2<sup>9</sup> for Smart-seq2 sequencing data and edgeR<sup>22</sup> using the likelihood ratio test for the 10x sequencing data, with modeling the donor categorical as covariate where applicable (supplemental Figure 4B). Additionally, the Wilcoxon rank sum (WRS) test, as implemented in Scanpy, was used to test differential mRNA and cell surface protein expression between groups of cells. Prior to gene set enrichment analysis, differential gene expression lists were ranked based either on the Wald statistic (from DESeq2 results of Smart-seq2 data) or by the product of the sign of the fold change with the  $-\log_{10}$  of the p-value (for all edgeR results where donor was used as covariate, supplemental Figure 4B) or by Wilcoxon rank sum test (Figure 4D,G, supplemental Figure 5D,11C).

### **Pseudotime**

Pseudotime was calculated initially on the diffusion map of the *multitissue base normalized dataset* (integrating all OD samples and LD-PB) using diffusion pseudotime (DPT)<sup>23</sup> (as implemented in Scanpy). Upon analysis of the scores and the lineage marker plots cells scoring in pseudotime above 0.15 (1,578 cells) and 5 cells belonging to clusters 20, 25, 26 were identified as mature cell types and excluded and the diffusion map and DPT recalculated. The root cell was selected from the BM cells on cluster 4 (HSC/MPP1). DPT and a root cell in cluster 4 was also used for pseudotime calculation of ADT-data from CITE-seq of OD3 (BM) and OD4 (BM, spleen).

### **10x scRNA-seq data - Integration of cell cycle regressed data**

An additional integration of the data from the OD-BM, OD-spleen, OD-PB and LD-PB samples was performed. As previously, we used Seurat for that purpose. However, in this integration the filtered counts were processed through a variance stabilizing transformation (sctransform), in lieu of the more commonly used steps of log-transformation. Additionally, using the vars.to.regress parameter, we regressed for number of counts, number of genes, fraction of mitochondrial genes and cell cycle. Downstream of these steps, the integration followed as previously described for the *multitissue seurat integrated dataset* leading to what we henceforth refer as the *multitissue base regressed dataset*. Using again the Leiden algorithm for clustering we

initially chose a Leiden resolution of 0.7, and identified 2 clusters (15,16) as mature, which we excluded. Proceeding to an additional round of re-clustering, at a resolution of 1.3 led us to exclude another cluster identified as mature (20). On a final round of reclustering we settled on the Leiden resolution of 1.4 as the final dataset partitioning.

### **Lineage characterization**

Characterization of the clusters defined via Leiden clustering was achieved through i) ranked gene groups (by score) WRS tests using a one-versus-rest strategy, thus retrieving the most differentially expressed genes in a cluster relative to the remainder clusters; ii) the expression of known gene markers for specific lineages within the Leiden clusters was further investigated by plotting them onto the previously generated embeddings and verifying their co-localization with respect to the defined clusters. Clusters of My and Meg/Ery/Eo/Baso/MC (MEMB) lineages were further grouped into 'early' and 'late' progenitors (see Table S2c) based on their order along a diffusion pseudotime axis and progressive increase in marker gene as well as surface marker expression. Using pseudotime and cluster annotation, 1583 mature cells were excluded from the *multitissue seurat integrated dataset* (integrating ODs and LD-PB) prior to further downstream analysis steps (cell distribution, lineage scores, de novo pseudotime, cell cycle scores, CITE-seq analysis, comparison to HCA-BM data). Cluster 14 of the same dataset was relatively enriched for cells with a high fraction of mitochondrial reads, had relatively low read counts per cells and could not be assigned to any hematopoietic lineage using the strategy above, nor to any other cell lineage using the MSigDB C8 gene signatures. We thus termed it ND/LQ (Not Determined / Low quality) and excluded it from all downstream analyses.

### **Analysis of cell distribution**

After exclusion of mature cells, cluster counts were normalized to 5000 total cells per donor and tissue for a standardized comparison of cluster/HSPC group composition between different sites. For statistical analysis of cluster/HSPC group composition, the normal distribution of each cluster/HSPC group was tested for each tissue using a Shapiro-Wilk test on the normalized cluster counts. Next, a one-way ANOVA with post-hoc Tukey multiple pairwise-comparisons was performed on normally distributed clusters/HSPC group. A Kruskal-Wallis test with Dunn's multiple comparison was used for not normally distributed clusters/HSPC groups. To visualize the different cell distributions in each tissue along the UMAP coordinates, a random 2500 cells were first selected for each donor and tissue to allow equal contribution of each sample.

Cells of the same tissue were combined and then a 2D kernel density estimation was performed using the `stat_density_2d` function of `ggplot2`.

### **Self-assembly manifolds (SAM) of HSC/MPPs**

The subset of BM and spleen cells from ODs 1, 2 and 4 in the *multitissue seurat integrated dataset* that were defined as HSC/MPPs (Leiden clusters 0, 4, 5, 11, 21) was processed with the Self-assembling manifold (SAM) approach<sup>24</sup> with the aim of getting better resolution in cell segregation (supplemental Figure 10). This subset was corrected using Scanorama<sup>25</sup> before being processed with SAM, while disabling inbuilt standardization. K-means (k=2) clustering was subsequently computed after visual inspection of the UMAP plots.

### **Cell-cycle, Ery-Meg-priming, lineage/HSC and identity scores**

The Scanpy implementation of the “score genes cell cycle” method presented by<sup>11</sup> was used to calculate S phase and G2-M phase scores, as well as the lineage and identity scores. To retrieve the gene lists used to calculate the Ery and Meg scores, differentially expressed genes between EryP (cluster 8) and MegP (cluster 22) were analyzed and the top50 genes (FDR <0.05, ranked by LFC) were extracted as being most characteristic of each population. For GMP-, MLP-, MEP- and HSC-scores, the top50 genes of published gene sets enriched in prospectively isolated HSPC subsets<sup>26</sup> were used. The gene lists used for the BM-type and SPL-type HSC/MPP identity scores were built from the overlap of significantly differentially expressed genes (FDR<0.05) between cluster SAM0-med and SAM1-extramed that were found in all ODs (OD1, 2, 4). For the medullary identity score all 72 overlapping genes were used (LFC>0 in each donor), whereas for the extramedullary identity score only the top 120 genes with LFC>0.3 in each donor were used. These gene lists (see Table S4) were then used as input in the score genes method (implemented in Scanpy) to calculate the Ery-Meg-priming, lineage/HSC and identity scores.

To quantify the proportions of HSC/MPPs with a BM- or SPL-type identity score, a ratio of the scaled score values (to be between 0 and 1) was calculated. The score ratio in transcriptionally identified HSC/MPPs from BM and/or spleen in our 10x dataset was used as a reference to compare the score ratio in other tissues from the same landscape or from independent datasets. Ratios of these scores above 1 and below 1 respectively indicated BM-type and spleen-type identities. To detect differential expression patterns of the signature genes defining the BM- and spleen-type identity (same as to calculate scores), the package `DEGreport`

(<http://lpantano.github.io/DEGreport/>) was used on the log-normalized UMI counts of HSC/MPPs (Leiden clusters 0, 4, 5, 11, 21) from different tissues.

### **Gene set enrichment analysis**

Gene set enrichment analysis (GSEA) was performed with the GSEA software (v4.1) using pre-ranked gene lists (WRS or “edgeR-derived ranking score”, as previously described). Enrichment was tested for C2 curated gene sets and hallmark gene sets of the MSigDB database v7.2<sup>27</sup>, published population-specific signatures<sup>26,28</sup>, lineage-priming modules<sup>29</sup> as well as signatures of human BM LT- and ST-HSCs (Cabezas-Wallscheid et al., submitted) as reference gene sets. Further, two sets of genes previously found either up- or down-regulated in mouse HSCs after treatment with mobilizing agents compared to untreated HSCs<sup>30</sup> were used. All gene sets used in this study are listed in Table S4.

### **Cell projection and annotation transfer**

For transferring annotations from a reference dataset to a target dataset of interest, we have used cell project (<https://github.com/lwo-K/cellproject>), a tool which allows to map cell coordinates from a target dataset’s embedding into a reference dataset’s embedding, as well as the transference of selected annotations.

Wherever possible, scRNA-seq data was compared to the benchmark HCA-BM dataset<sup>1</sup>, generated by 10x scRNA-seq of MNCs. We used the same single cells selected as CD34<sup>+</sup> (based on mRNA expression) in the published study<sup>31</sup>. To best compare with our CD19<sup>-</sup>CD34<sup>+</sup> sorted cells, all CD19 expressing clusters (cluster “CD34<sup>+</sup> pre-B”, “CD34<sup>+</sup> pre-PC”, “CD34<sup>+</sup> pre-B cycling”, “CD34<sup>+</sup> Lymphoid UNK” as labeled in the original publication) were first excluded from this dataset. We then used cell project to i) transfer cluster annotations (label transfer) from our *multitissue seurat integrated dataset* (BM cells subset) to the HCA-BM dataset filtered as described above (Table S2f). We also performed the reverse, ii) where we used the filtered HCA-BM dataset as a reference and label transferred its annotations to our full *multitissue seurat integrated dataset* (Table S2o). Similarly, as described for our own 10x scRNA-seq dataset, cluster counts were normalized to 5,000 total cells for each donor of the HCA-BM (Table S2f) to allow a standardized comparison of cluster/HSPC group composition to our own dataset.

The same approach of label transfer was also applied individually on the integrated spleen and integrated mobilized peripheral blood datasets. Here, the datasets were split into ‘target datasets’, comprising the iii) two HS spleen samples (Table S2l) and the iv) four G-CSF mobilized PB (Table S2j) respectively, and the remainder of cells

from each (OD spleens or BM plus PBs, respectively) constituting the reference datasets. Finally, and still using the same method, we projected v) single CD71<sup>+</sup> HSC/MPPs on a reference set generated from reintegrating only the cells from our HSC/MPP clusters (0, 4, 5, 11, 21) from our *multitissue seurat integrated dataset*.

### **Estimation of cells actively dividing and cellular expansion modes in the MEMBP and MyP branch**

The number of active cells in each cluster of the MEMBP and MyP branches was calculated as: (number of cells in the a given cluster) \* (proportion of cells in that cluster in S-G2-M) (values for calculations taken from Table S2n). Then values were renormalized to 5,000 cells. We postulate that this is the minimum number of cells that is bound to divide at any given moment, as they have passed the R point of the cell cycle.

Based on transcriptomic characteristics, cell cycle assignment and pseudotime, we postulated 3 steps in both MEMBP and MyP differentiation: i) an early step (containing cells with no suspected differentiation potential towards other lineages and lowest pseudotime); ii) a late step (including the cluster with marker differentiation markers and the highest pseudotime), and iii) an intermediate step (defined as all the clusters in between early and late steps).

Specifically, in the multitissue integrated dataset, for the MEMBP branch, these were: Early step: MEP-MPP (cluster 10) + MEP1 (cluster 12); Intermediate step: MEP2 (cluster 2); Late step: EryP (cluster 8) + MkP (cluster 22) + Eo/Baso/MCP (cluster 17) + MEP\_cycle (cluster 13). For the MyP branch, the steps were: Early step: CMP-MPP (cluster 7) + MyP1 (cluster 6); Intermediate step: MyP2 (cluster 9); Late step: MyP3 (cluster 16) + MyP4 (cluster 15).

The numbers of active cells were normalized to the Early Step of the respective branch. We then estimated the number of divisions occurring in each branch in the BM, with the assumption that from the respective early steps onwards all divisions are symmetric towards differentiation. This was obtained as follows:

$\text{Log}_2(\text{Norm Active cells at late stage in BM}) - \text{Log}_2(\text{Norm Active cells at early stage in BM})$ .

The number of divisions between the early and late steps in the MEMBP and MyP branches was estimated respectively as 5.81 (standard deviation: 0.55) and 2.83 (standard deviation: 0.47). If the differentiation kinetics were similar to the BM, the number of cells expected at the late stage of differentiation in spleen and PB would be:

$2^{(\text{number of divisions estimated from BM})} * \text{number of active cells at early stage}$ .

The number of active cells in each cluster of the MEMBP and MyP branches was also calculated for the integrated spleen datasets (using values in Table S2n). The raw values obtained for the OD spleens were very close to those obtained for the same samples in the multitissue integrated dataset. For better direct comparison to this dataset and the data in Figure 3D, the values of active differentiation cells were normalized to those found for OD-spleen in the multitissue dataset before being visualized in Figure 5D.

### **My, Ly, Ery and Meg single-cell differentiation assay**

One day before the sort, MS5 cells at passage 10-13<sup>32</sup> (imported from Prof Katsuhiko Itoh at Kyoto University) were seeded at 3000 cells per well of a 96-well flat-bottom plate (Nunc) in 100  $\mu$ l Myelocult H5100 medium (Stem Cell Technologies) + 1% Pen/Strep (Life Technologies). The next day, medium was replaced by 100  $\mu$ l/well StemPro-34 SFM medium (Life Technologies) supplemented with 3.5 % StemPro-34 nutrients (Life Technologies), SCF 100 ng/ml, Flt3-L 20 ng/ml, TPO 100 ng/ml, IL-6 50 ng/ml, IL-3 10 ng/ml, IL-11 50 ng/ml, GM-CSF 20 ng/ml, IL-2 10 ng/ml, IL-7 20 ng/ml (all Miltenyi Biotec), erythropoietin (EPO) 3 units/ml (Eprex, Janssen-Cilag), h-LDL 50 ng/ml (Stem Cell Technologies), 1% L-Glutamine (Life Technologies) and 1% Pen/Strep. Single phenotypic HSC/MPPs (from LD-BM, healthy LD-PB, ET LD-PB, b-thal LD-PB, OD-BM, OD-spleen or HS spleen) or CD71<sup>-</sup> and CD71<sup>+</sup> HSC/MPPs from LD-PB were index-sorted into each well and incubated at 37 °C for 2-3 weeks prior to analysis by flow cytometry (BM, spleen 3 weeks; PB 2 weeks). If necessary, medium was topped up with 50  $\mu$ l StemPro medium plus supplements at the half time of culture. For colony harvest, cells from each well were transferred through a 30-40  $\mu$ m plate filter (Pall Laboratory) into 96 U-bottom plates, to exclude co-cultured MS5 cells. Cells were stained with antibody panel (I) or (J) for 20 min at RT in the dark, washed once with PBS/FBS and resuspended in 100  $\mu$ l PBS/FCS per well, and 50  $\mu$ l were used for high-throughput flow cytometry analysis. For colonies from ET PB HSC/MPPs, the residual 50  $\mu$ l were kept for genotyping. A single cell was defined as giving rise to a colony if the sum of cells detected in the CD45<sup>+</sup> and GlyA<sup>+</sup> gates was > 30 cells. Colony efficiency was calculated as the number of positive colonies divided by the number of seeded single cells. Individual colonies were identified as positive if they contained at least the indicated number of surface-marker positive cells: Ery (CD45<sup>-</sup>GlyA<sup>+</sup>) > 30 cells, Meg CD41<sup>+</sup> > 20 cells, My colonies (sum of CD45<sup>+</sup>CD14<sup>+</sup> and CD45<sup>+</sup>CD15<sup>+</sup>) > 30 cells, NK colonies (CD45<sup>+</sup>CD56<sup>+</sup>) > 30 cells (also see gating strategy in supplemental Figure 7C). Colonies were identified as undifferentiated (undiff) if the sum of cells in CD45<sup>+</sup> and GlyA<sup>+</sup> gates exceeded 30, but the cells could not be

identified as positive for any lineage (Ery, Meg, My, NK) using the criteria above. For visualization purposes, 'EryMegMy' colonies are the sum of EryMegMy and MegMy colonies, the latter of which only appeared at proportions <3% in 7 of the samples. For the same reason the low fraction of EryNk (<1% of all colonies in one sample only) were combined with EryMegNK colonies and are labeled as 'EryMegNK'. The median colony size (Figure 7D) was determined for each donor individually as: median of the cell counts in the My gates (sum of CD45<sup>+</sup>CD14<sup>+</sup> and CD45<sup>+</sup>CD15<sup>+</sup>) for all positive colonies containing myeloid cells or in the CD45<sup>+</sup>GlyA<sup>+</sup> gate for all positive colonies containing erythroid cells. For time to first division experiments, single phenotypic MEPs from LD-BM and LD-PB or single CD71<sup>+</sup> phenotypic HSC/MPPs were directly sorted into round-bottom 96 well plates containing the same medium as above. Cells were counted under an inverted microscope every 24 h for 4 days of culture. Empty wells were excluded from the analysis. After 2 weeks, colonies were harvested and analyzed as described above.

### **Genotyping ET colonies**

For each colony grown from ET PB HSC/MPPs, half of the cells were used for genotyping. For DNA extraction, colonies were transferred into 96-well PCR plates, spun down, resuspended in 10 µl 0.2M NaOH and incubated for 5 min. After addition of 90 µl Tris-HCL pH7.5 genomic DNA was stored at -20 °C until genotyping.

Genotyping was performed by allele-specific PCR analysis as described in <sup>33</sup>. Briefly, DNA was amplified using one reverse primer (5'CTGAATAGTCCTACAGTGTTTTTCAGTTTCA3') and two forward primers (one annealing upstream to the mutation site: 5'ATCTATAGTCATGCTGAAAGTAGGAGAAAG3'; and one binding the c.1849G>T mutation at 3'end (5'CTGAATAGTCCTACAGTGTTTTTCAGTTTCA3')). PCR products – of 364-bp and 203-bp, respectively –, were separated by gel electrophoresis and the mutational status was determined based on the presence or absence of the 203-bp product. The 364-bp product served as internal control of the reaction.

### **Single-cell Ery/Meg assay**

Single cells of the indicated populations (all isolated from LD-PB) were sorted into each well of a U-bottom plate containing 100 µl StemSpan SFEM II (Stem Cell Technologies) supplemented with SCF 100 ng/ml, TPO 100 ng/ml, IL-6 10 ng/ml, IL-3 10 ng/ml, EPO 1 unit/ml, h-LDL 40 ng/ml and 1% Pen/Strep. After 2 weeks of culture at 37 °C, the plate was spun down and single-cell derived colonies were stained with antibody panel (K) for 20 min at RT in the dark, washed once with PBS/FBS and



resuspended in 100  $\mu$ l PBS/FCS per well for high-throughput flow cytometry analysis. A single cell was defined as giving rise to a colony if the sum of cells detected in the CD45<sup>+</sup> and GlyA<sup>+</sup> gates was > 30 cells. Individual colonies were identified as positive if they contained at least the indicated number of surface-marker positive cells: Ery (CD45<sup>-</sup>GlyA<sup>+</sup>) > 30 cells, Meg (GlyA<sup>-</sup>CD41a<sup>+</sup>CD42b<sup>+</sup>) > 20 cells, My (CD45<sup>+</sup>CD11b<sup>+</sup>) > 30 cells (also see gating strategy in supplemental Figure 8B). Colonies were identified as undifferentiated (undiff) if the sum of cells in CD45<sup>+</sup> and GlyA<sup>+</sup> gates exceeded 30, but the cells could not be identified as positive for any lineage (Ery, Meg, My) using the criteria above.

### **Serial replating assay**

For serial replating assays, 1,500 - 2,000 CD71<sup>-</sup> HSC/MPPs, 800 - 2,000 CD71<sup>+</sup> HSC/MPPs or 500 - 2,000 E-MEPs were sorted into 300  $\mu$ l PBS + 3% FBS in 1.5 ml microcentrifuge tubes. After centrifugation at 500xg for 5 min, the cells were resuspended in 100  $\mu$ l PBS/FBS and added to 2.5 ml Methocult H4034 Optimum medium (Stem Cell Technologies) supplemented with Flt3-L 10 ng/ml, IL-6 10 ng/ml (Miltenyi Biotec) and 1% Pen/Strep (Life Technologies). Next, samples were plated as technical duplicates into 6 well SmartDishes (Stem Cell Technologies) following the manufacturer's protocol. After 2 weeks of culture at 37 °C, the number and type of colony forming units was determined by visual inspection of photographs taken with the StemVision instrument (Stem Cell Technologies). Colonies were harvested on day 14 and 15,000 - 40,000 cells from each well were replated into a secondary methylcellulose culture. Secondary cultures were incubated for 2 weeks culture at 37 °C before determination of colony numbers and types. For one of the replicates, multiple LD-PB donors were combined prior to sort, whereas all other replicates were performed with LD-PB from individual donors. The sum of the technical duplicates was used for analysis.

### **Megacult assay**

The Megacult<sup>TM</sup>-C kit (Stem Cell Technologies) was used. In brief, 150 - 7,700 CD71<sup>-</sup> HSC/MPPs or 500 - 4,100 CD71<sup>+</sup> HSC/MPPs from LD-PB were mixed with 1 ml Megacult<sup>TM</sup>-C medium supplemented with 1% Pen/Strep, 40  $\mu$ g/ml h-LDL, 0.6 ml Collagen Solution and seeded as technical duplicates. After 12 days culture at 37 °C, colonies were fixed and stained for CD41 according to the manufacturer's protocol. Colonies were scored using a bright field microscope and identified as follows: small Meg colony: 3-20 CD41<sup>+</sup> cells; intermediate Meg colony: 21-49 CD41<sup>+</sup> cells; large Meg colony  $\geq$  50 CD41<sup>+</sup> cells; mixed colony:  $\geq$  20 cells containing CD41<sup>+</sup> and CD41<sup>-</sup> (only

nuclei staining) cells; non Meg colonies  $\geq 20$  CD41<sup>-</sup> cells. For one of the replicates, multiple LD-PB donors were combined prior to sort, whereas all other replicates were performed with PB from individual donors. The average values of technical duplicates were used.

### **Xenotransplantation assays**

Different cell doses of indicated populations (445 - 21,700 HSC/MPPs; 100 - 8,000 CD71<sup>-</sup> HSC/MPPs; 165 - 10,700 CD71<sup>+</sup> HSC/MPPs; all isolated from LD-PB; or 50 - 36,500 from cord blood HSC/MPPs as controls, see Table S5) were transplanted into age-matched female NSG mice. One day before transplantation, 12–16 weeks old mice were pre-conditioned by sublethal irradiation (2.4 Gy), and cells were sorted into X-VIVO 10 Serum free hematopoietic cell medium (Lonza) supplemented with 1% BSA (Roche), 1% L-glutamine, 1% Pen/Strep (both Life Technologies), SCF 100 ng/ml, Flt3-L 100 ng/ml, TPO 50 ng/ml, IL-7 10 ng/ml (all Miltenyi Biotec) and kept in medium overnight at 37 °C. The next morning, mice were anaesthetized with isoflurane and different cell doses of indicated populations (Table S5) were injected intrafemorally in 25  $\mu$ l PBS + 0.1% Pen/Strep. Buprenorphine (0.1 mg/kg, Animalcare) was injected subcutaneously as analgesic. The cohorts transplanted for 2 and 4 weeks with CD71<sup>-</sup> and CD71<sup>+</sup> HSC/MPPs, were given intraperitoneal injections of hEPO (20 units/injection, Eprex, Janssen-Cilag) twice a week to promote human red blood cell differentiation<sup>2</sup>. Mice transplanted with varying doses of CD71<sup>-</sup> HSC/MPPs and CD71<sup>+</sup> HSC/MPPs were analyzed at 2, 4 and 8 weeks post transplantation. Mice transplanted with PB HSC/MPPs were analyzed at 8 and 16 weeks post transplantation. For some experiments, cord blood (CB) phenotypic HSC/MPPs were transplanted as positive controls and analyzed at 8 and 16 weeks respectively (engraftment is summarized in Table S5).

At the final analysis time points, the injected femur was harvested separately from the non-injected femur and both tibias. Bone marrow was flushed with IMDM + 5% FBS. Cells from the cohorts that received CD71<sup>-</sup> and CD71<sup>+</sup> HSC/MPPs and were injected with EPO were stained with antibody panel (M). The cells from all other cohorts (transplanted with CD71<sup>-</sup> and CD71<sup>+</sup> HSC/MPPs for 8 or 16 weeks, and all mice transplanted with PB HSC/MPPs) were stained with antibody panel (L).

To allow confident detection of human leukocyte engraftment, we stained all samples with two distinct antibodies against CD45. Cells were only considered human leukocytes if they were positive for both CD45 antibodies (CD45<sup>++</sup>, see supplemental Figure 7A, 8K) as previously described in<sup>8</sup>. Threshold of engraftment was set to  $\geq 0.01$  % CD45<sup>++</sup> cells with at least 30 cells recorded in the CD45<sup>++</sup> gate. Cells were counted

as My lineage if  $CD45^{++}CD33^{+} \geq 20$  cells; Ly lineage if  $CD45^{++}CD19^{++} \geq 20$  cells (positive for two distinct CD19 antibodies); Ery lineage:  $CD45^{-}GlyA^{+} \geq 20$  cells or  $CD45^{-}CD71^{+}GlyA^{+} \geq 20$  cells. Example gating strategies are shown in supplemental Figure 7A, 8K. An estimate of the number of repopulating cells within each transplanted subpopulation was calculated from the engraftment of limiting cell doses using Extreme Limiting Dilution Analysis (ELDA) statistics<sup>34</sup>.

### **Sample size determination and study design**

In all experiments the maximal possible sample size was used, considering limited the availability of primary human samples and rarity of the HSPC populations. Unless otherwise indicated, single-cell experiments were repeated at least three times with independent biological samples. For all single cell functional assays, at least 40 single cells were seeded per condition and biological replicate to ensure sufficient power of the assays. For limiting dilution assay transplantation experiments, a minimum of 10 animals per population and at least three cell doses were analyzed. No specific randomization or blinding of NSG mice was performed as all mice shared the same genetic background and were age-matched females.

## SUPPLEMENTAL NOTE 1

In this study we have leveraged the use of hematopoietic samples from multiple sources to study HSPC dynamics at extramedullary sites. This included analysis of organ donors (OD) and healthy living donors (LD) derived tissues as well as meta-analysis of published BM data<sup>31</sup> (HCA-BM) to benchmark our findings. We have indicated the source of the material for every datapoint and compared tissues from the same source wherever possible. For most parameters, we have found no significant differences between tissues isolated from different sources. Here we discuss the few instances of measurable differences in HSPC composition in a specific tissue across different sources.

Comparing OD-PB to LD-PB we noticed a slight increase in the abundance of transcriptionally defined early MyPs and HSC/MPPs (HSC/MPP2 and HSC/MPP3 clusters) in OD-PB compared to LD-PB (supplemental Figures 2B, 11A). This was associated with an increase in the BM- to spleen-type ratio (supplemental Figure 11B), particularly marked for one donor OD2, indicating an increased proportion of BM-type HSC/MPPs in OD-PB. Gene sets associated with LT-HSCs or up-regulated in mouse HSCs after treatment with mobilizing drugs<sup>30</sup> were enriched in HSC/MPPs from ODs compared to HSC/MPPs from LDs (supplemental Figure 11C). None of the ODs used for 10x scRNA-seq did show any clinical records of cardiovascular or other chronic diseases that could have influenced circulation of CD34<sup>+</sup> cells. Thus, we believe this was the result of mobilization of BM HSC/MPPs due to trauma and brain death associated cytokine and neurotransmitter release<sup>35-38</sup> in certain ODs. In line with a potential mobilization of cytokine-activated progenitors, we observe that several progenitor cell types are more cycling in OD-PB compared to LD-PB, albeit still less than compared to the matched BM progenitors (supplemental Figure 4A, 11D). Furthermore, the ratio of early MEMBP to early MyP progenitors is lower in OD-PB compared to LD-PB (supplemental Figure 11E), and more similar to the ratio observed in BM and G-CSF mobilized PB (supplemental Figure 11F), suggesting an increased circulation of myeloid progenitors in OD-PB.

We have also used the benchmark HCA-BM data to verify our findings on extramedullary HSPCs. When directly comparing scRNA-seq from OD-BM to the HCA-BM we noticed a slight increase in cells classified as HSC/MPP and late My progenitors in our OD-BM (supplemental Figure 11D). These could be equally attributed to: 1) distinct sources of BM harvested (sternum vs femur), 2) distinct physiological status of

the donors (brain or circulatory death vs healthy and alive), 3) different methods of purification of CD34<sup>+</sup>CD19<sup>-</sup> cells (flow cytometry vs mRNA expression). We did not observe any significant difference in the proliferative and differentiation capacity of HSC/MPPs or MEPs purified from either OD or LD (supplemental Figures 4C-E, 7D), indicating no major changes in HSC subsets function between these two sources. Thus, observed differences have no impact on the conclusions of our study on the features of extramedullary hematopoiesis (Figures 2B-D vs supplemental Figures 2F-H; Figure 4I; Figure 6B vs S7B).

## SUPPLEMENTAL TABLES

**Table S1.** Information on the deceased organ donors (ODs) and living donors (LDs) used in this study.

**Table S2.** Marker genes, cluster counts and cell scores for all datasets. Table content is summarized in the first worksheet.

**Table S3.** Results of all differential expression and differential pattern analysis performed on RNA-seq and cell surface protein data. Table content is summarized in the first worksheet.

**Table S4.** List of all gene sets used for GSEA and cell scores and results of all gene set enrichment analyses performed. Table content is summarized in the first worksheet.

**Table S5. List of NSG mice used for xenotransplants.**

| mouse | Cell population transplanted    | Cell number transplanted | Weeks of engraftment | Engrafted? | Engraftment [% hCD45++] | Lineage composition |       |        |
|-------|---------------------------------|--------------------------|----------------------|------------|-------------------------|---------------------|-------|--------|
|       |                                 |                          |                      |            |                         | % Ery               | % My  | % Ly   |
| 1     | LD-PB HSC/MPP                   | 395                      | 8                    | no         | -                       | -                   | -     | -      |
| 2     |                                 | 395                      | 8                    | yes        | 1.840                   | 0.00                | 2.32  | 97.68  |
| 3     |                                 | 395                      | 8                    | no         | -                       | -                   | -     | -      |
| 4     |                                 | 395                      | 8                    | yes        | 0.122                   | 0.00                | 0.00  | 100.00 |
| 5     |                                 | 445                      | 8                    | no         | -                       | -                   | -     | -      |
| 6     |                                 | 1805                     | 8                    | yes        | 0.171                   | 0.01                | 3.66  | 96.33  |
| 7     |                                 | 2253                     | 8                    | no         | -                       | -                   | -     | -      |
| 8     |                                 | 2253                     | 8                    | yes        | 0.024                   | 0.00                | 51.53 | 48.47  |
| 9     |                                 | 2253                     | 8                    | yes        | 2.370                   | 0.00                | 1.02  | 98.97  |
| 10    |                                 | 2253                     | 8                    | no         | -                       | -                   | -     | -      |
| 11    |                                 | 5250                     | 8                    | no         | -                       | -                   | -     | -      |
| 12    |                                 | 5250                     | 8                    | no         | -                       | -                   | -     | -      |
| 13    |                                 | 5250                     | 8                    | yes        | 0.031                   | 0.00                | 4.62  | 95.38  |
| 14    |                                 | 5250                     | 8                    | yes        | 1.030                   | 0.00                | 4.76  | 95.24  |
| 15    |                                 | 21700                    | 8                    | yes        | 2.460                   | 0.02                | 1.73  | 98.26  |
| 16    |                                 | 131                      | 16                   | yes        | 0.039                   | 0.00                | 0.00  | 100.00 |
| 17    |                                 | 307                      | 16                   | no         | -                       | -                   | -     | -      |
| 18    |                                 | 307                      | 16                   | no         | -                       | -                   | -     | -      |
| 19    |                                 | 939                      | 16                   | no         | -                       | -                   | -     | -      |
| 20    |                                 | 3075                     | 16                   | no         | -                       | -                   | -     | -      |
| 21    |                                 | 3075                     | 16                   | yes        | 0.160                   | 0.00                | 1.64  | 98.36  |
| 22    |                                 | 3257                     | 16                   | no         | -                       | -                   | -     | -      |
| 23    |                                 | 5124                     | 16                   | yes        | 0.044                   | 0.00                | 0.00  | 100.00 |
| 24    |                                 | 6766                     | 16                   | yes        | 0.023                   | 0.00                | 97.68 | 2.32   |
| 25    |                                 | 6766                     | 16                   | no         | -                       | -                   | -     | -      |
| 26    | LD-PB CD71 <sup>-</sup> HSC/MPP | 343                      | 2                    | yes        | 0.019                   | 0.00                | 96.56 | 3.44   |
| 27    |                                 | 500                      | 2                    | no         | -                       | -                   | -     | -      |
| 28    |                                 | 600                      | 2                    | no         | -                       | -                   | -     | -      |
| 29    |                                 | 926                      | 2                    | no         | -                       | -                   | -     | -      |
| 30    |                                 | 926                      | 2                    | no         | -                       | -                   | -     | -      |
| 31    |                                 | 3017                     | 2                    | yes        | 0.034                   | 0.00                | 25.99 | 74.01  |
| 32    |                                 | 3492                     | 2                    | no         | -                       | -                   | -     | -      |
| 33    |                                 | 3500                     | 2                    | no         | -                       | -                   | -     | -      |
| 34    |                                 | 3500                     | 2                    | no         | -                       | -                   | -     | -      |
| 35    |                                 | 5000                     | 2                    | yes        | 0.149                   | 0.02                | 85.91 | 14.07  |
| 36    |                                 | 5000                     | 2                    | yes        | 0.014                   | 0.00                | 7.69  | 92.31  |
| 37    |                                 | 750                      | 4                    | yes        | 0.016                   | 0.00                | 32.60 | 67.40  |
| 38    |                                 | 798                      | 4                    | yes        | 0.413                   | 0.00                | 49.23 | 50.77  |
| 39    |                                 | 850                      | 4                    | yes        | 0.017                   | 0.00                | 98.96 | 1.04   |
| 40    |                                 | 1453                     | 4                    | yes        | 0.016                   | 0.00                | 69.68 | 30.32  |
| 41    |                                 | 1500                     | 4                    | no         | -                       | -                   | -     | -      |
| 42    |                                 | 1500                     | 4                    | yes        | 0.073                   | 0.00                | 97.06 | 2.94   |
| 43    |                                 | 1600                     | 4                    | yes        | 0.226                   | 0.00                | 89.19 | 10.81  |
| 44    |                                 | 1600                     | 4                    | yes        | 0.038                   | 0.00                | 90.71 | 9.29   |
| 45    |                                 | 8000                     | 4                    | no         | -                       | -                   | -     | -      |
| 46    |                                 | 5000                     | 8                    | yes        | 1.36                    | 0.00                | 20.61 | 79.39  |
| 47    |                                 | 5000                     | 8                    | yes        | 4.46                    | 0.00                | 1.86  | 98.14  |
| 48    |                                 | 5000                     | 8                    | yes        | 0.662                   | 0.00                | 0.29  | 99.71  |
| 49    |                                 | 100                      | 8                    | no         | -                       | -                   | -     | -      |
| 50    |                                 | 100                      | 8                    | no         | -                       | -                   | -     | -      |
| 51    |                                 | 100                      | 8                    | no         | -                       | -                   | -     | -      |
| 52    |                                 | 1300                     | 8                    | yes        | 8.57                    | 0.00                | 3.23  | 96.77  |
| 53    |                                 | 1300                     | 8                    | yes        | 0.081                   | 0.00                | 97.25 | 2.75   |
| 54    |                                 | 1300                     | 8                    | yes        | 0.028                   | 0.00                | 25.88 | 74.12  |
| 55    |                                 | 1300                     | 8                    | no         | -                       | -                   | -     | -      |
| 56    |                                 | 150                      | 16                   | no         | 0.000                   | -                   | -     | -      |
| 57    |                                 | 150                      | 16                   | no         | 0.002                   | -                   | -     | -      |
| 58    |                                 | 150                      | 16                   | no         | 0.001                   | -                   | -     | -      |
| 59    |                                 | 4000                     | 16                   | yes        | 0.045                   | 0.00                | 1.7   | 98.3   |

|     |                           |       |    |     |       |      |       |       |
|-----|---------------------------|-------|----|-----|-------|------|-------|-------|
| 60  |                           | 4000  | 16 | no  | 0.002 | -    | -     | -     |
| 61  |                           | 4000  | 16 | no  | 0.002 | -    | -     | -     |
| 62  |                           | 1000  | 16 | no  | 0.001 | -    | -     | -     |
| 63  |                           | 1000  | 16 | no  | 0.000 | -    | -     | -     |
| 64  |                           | 1000  | 16 | yes | 0.014 | 0.00 | 14.5  | 85.5  |
| 65  |                           | 3000  | 16 | yes | 0.222 | 0.01 | 28.88 | 71.12 |
| 66  |                           | 3000  | 16 | no  | 0.001 | -    | -     | -     |
| 67  |                           | 700   | 16 | yes | 0.013 | 0.00 | 96.08 | 3.92  |
| 68  | LD-PB<br>CD71+<br>HSC/MPP | 165   | 2  | no  | -     | -    | -     | -     |
| 69  |                           | 500   | 2  | no  | -     | -    | -     | -     |
| 70  |                           | 600   | 2  | no  | -     | -    | -     | -     |
| 71  |                           | 2000  | 2  | no  | -     | -    | -     | -     |
| 72  |                           | 2000  | 2  | no  | -     | -    | -     | -     |
| 73  |                           | 3031  | 2  | no  | -     | -    | -     | -     |
| 74  |                           | 3689  | 2  | no  | -     | -    | -     | -     |
| 75  |                           | 5000  | 2  | no  | -     | -    | -     | -     |
| 76  |                           | 7300  | 2  | no  | -     | -    | -     | -     |
| 77  |                           | 10700 | 2  | no  | -     | -    | -     | -     |
| 78  |                           | 656   | 4  | no  | -     | -    | -     | -     |
| 79  |                           | 750   | 4  | no  | -     | -    | -     | -     |
| 80  |                           | 789   | 4  | no  | -     | -    | -     | -     |
| 81  |                           | 850   | 4  | no  | -     | -    | -     | -     |
| 82  |                           | 1500  | 4  | no  | -     | -    | -     | -     |
| 83  |                           | 1500  | 4  | no  | -     | -    | -     | -     |
| 84  |                           | 1600  | 4  | no  | -     | -    | -     | -     |
| 85  |                           | 5200  | 4  | no  | -     | -    | -     | -     |
| 86  |                           | 8000  | 4  | no  | -     | -    | -     | -     |
| 87  | CB<br>HSC/MPP             | 36500 | 8  | yes | 63.5  | 0.01 | 1.14  | 98.85 |
| 88  |                           | 36500 | 8  | yes | 49.6  | 1.28 | 6.06  | 92.66 |
| 89  |                           | 50    | 16 | yes | 0.024 | 0.00 | 0.00  | 100   |
| 90  |                           | 50    | 16 | no  | 0.002 | -    | -     | -     |
| 91  |                           | 50    | 16 | yes | 0.175 | 0.00 | 78.31 | 21.69 |
| 92  |                           | 250   | 16 | yes | 62.8  | 0.08 | 1.66  | 98.26 |
| 93  |                           | 250   | 16 | yes | 7.37  | 0.00 | 2.56  | 97.44 |
| 94  |                           | 250   | 16 | yes | 58.7  | 0.04 | 1.71  | 98.25 |
| 95  |                           | 500   | 16 | yes | 78.7  | 0.42 | 2.85  | 96.74 |
| 96  |                           | 500   | 16 | no  | 0.005 | -    | -     | -     |
| 97  |                           | 500   | 16 | yes | 50.3  | 0.13 | 2.55  | 97.32 |
| 98  |                           | 1500  | 16 | yes | 20.9  | 0.01 | 1.49  | 98.51 |
| 99  |                           | 1500  | 16 | yes | 47.5  | 0.19 | 2.78  | 97.03 |
| 100 |                           | 15000 | 16 | yes | 73.6  | 2.56 | 2.59  | 94.85 |



**Table S6. List of antibodies used for flow cytometry.**

| Antigen        | Conjugate       | Clone        | Company       | Cat #      | Dilution |
|----------------|-----------------|--------------|---------------|------------|----------|
| CD3            | APC/Cy7         | HIT3a        | BioLegend     | 300318     | 1:100    |
|                | FITC            | HIT3a        | BD Pharmingen | 555339     | 1:500    |
| CD5            | PE              | UCHT2        | BD Pharmingen | 561897     | 1:300    |
| CD7            | BV421           | M-T701       | BD Horizon    | 562635     | 1:100    |
| CD10           | APC             | HI10a        | BioLegend     | 312210     | 1:100    |
|                | BV421           | HI10a        | BD Horizon    | 562902     | 1:100    |
| CD11b          | APC/Cy7         | ICRF44       | BioLegend     | 301342     | 1:300    |
| CD14           | PE-Cy7          | M5E2         | BioLegend     | 301814     | 1:1000   |
|                | APC/Cy7         | HCD14        | BioLegend     | 325619     | 1:1000   |
| CD15           | PE-Cy7          | M5E2         | BioLegend     | 301814     | 1:1000   |
|                | BV421           | MC-480       | BioLegend     | 125614     | 1:200    |
| CD19           | Alexa Fluor 700 | HIB19        | BioLegend     | 302226     | 1:300    |
|                | APC/Fire750     | HIB19        | BioLegend     | 302258     | 1:100    |
|                | BV785           | SJ25C1       | BioLegend     | 363028     | 1:600    |
|                | FITC            | HIB19        | BioLegend     | 302206     | 1:200    |
| CD33           | APC             | P67.6        | BD Pharmingen | 345800     | 1:200    |
| CD34           | APC             | 581          | BD Pharmingen | 555824     | 1:100    |
|                | APC-Cy7         | 581          | BioLegend     | 343514     | 1:100    |
| CD36           | APC             | 5-271        | BioLegend     | 336208     | 1:300    |
| CD38           | PE/Cy7          | HIT2         | BioLegend     | 303516     | 1:100    |
| CD41           | APC             | HIP8         | BioLegend     | 303709     | 1:200    |
|                | BV510           | HIP8         | BD Horizon    | 563250     | 1:200    |
|                | FITC            | HIP8         | BioLegend     | 303704     | 1:1000   |
| CD42b          | APC             | HIP1         | BioLegend     | 303912     | 1:200    |
| CD45           | BV510           | HI30         | BioLegend     | 304036     | 1:500    |
|                | PE-Cy5          | HI30         | BioLegend     | 304010     | 1:300    |
|                | BV605           | 2D1          | BioLegend     | 368524     | 1:100    |
| CD45RA         | Alexa Fluor 700 | HI100        | BioLegend     | 304120     | 0.25     |
|                | FITC            | HI100        | BD Pharmingen | 555488     | 1:100    |
|                | PE              | HI100        | BioLegend     | 304108     | 1:200    |
|                | BV421           | HI100        | BioLegend     | 304129     | 1:100    |
| CD49f          | PE-Cy5          | GoH3         | BD Pharmingen | 551129     | 1:100    |
| CD56           | APC             | HCD56        | BioLegend     | 318310     | 1:200    |
|                | APC             | 5.00E+10     | BD Pharmingen | 559869     | 1:100    |
|                | PE              | 5.00E+10     | BioLegend     | 328110     | 1:50     |
| CD90           | FITC            | 5.00E+10     | BioLegend     | 328108     | 1:50     |
|                | FITC            | CY1G4        | BioLegend     | 334104     | 1:1000   |
|                | PE              | CY1G4        | BioLegend     | 334106     | 1:1000   |
| CD71           | PerCP/Cy5.5     | CY1G4        | BioLegend     | 334113     | 1:800    |
|                | BV650           | CY1G4        | BioLegend     | 334115     | 1:100    |
|                | CD105           | BV650        | 266           | BD Horizon | 563466   |
| CD123          | BV785           | 6H6          | BioLegend     | 306032     | 1:100    |
| CD117 (c-Kit)  | BV650           | 266          | BD Horizon    | 563466     | 1:50     |
| CD135          | Alexa Fluor 647 | 4G8          | BD Pharmingen | 563494     | 1:50     |
|                | PE              | BV10A4H2     | BioLegend     | 313305     | 1:50     |
| CD370 (CLEC9A) | PE              | 8F9          | BioLegend     | 353804     | 1:75     |
| GlyA           | PE              | GA-R2 (HIR2) | BD Pharmingen | 340947     | 1:1000   |
|                | PE-Cy7          | HI264        | BioLegend     | 349112     | 1:300    |
|                | BV421           | GA-R2 (HIR2) | BD Horizon    | 562938     | 1:1000   |
| KI-67          | FITC            | B56          | BD Pharmingen | 556026     | 1:50     |

**Table S7. List of antibodies used for CITE-seq (Total-Seq™ A, BioLegend).**

|           | Clone          | Specificity           | Barcode | DNA Barcode      |
|-----------|----------------|-----------------------|---------|------------------|
| ADT_A0145 | Ber-ACT8       | CD103                 | 145     | GACCTCATTGTGAAT  |
| ADT_A0095 | RTK4530        | IgG2b, k Isotype Ctrl | 95      | GATTCTTGACGACCT  |
| ADT_A0167 | E11            | CD35                  | 167     | ACTTCCGTGCGATCTT |
| ADT_A0215 | 11C1           | CD268 (BAFF-R, BAFFR) | 215     | CGAAGTCGATCCGTA  |
| ADT_A0085 | BC96           | CD25                  | 85      | TTTGTCTGTACGCC   |
| ADT_A0161 | ICRF44         | CD11b                 | 161     | GACAAGTGATCTGCA  |
| ADT_A0147 | DREG-56        | CD62L                 | 147     | GTCCCTGCAACTTGA  |
| ADT_A0007 | 29E.2A3        | CD274 (B7-H1, PD-L1)  | 7       | GTTGTCCGACAATAC  |
| ADT_A0087 | UCHL1          | CD45RO                | 87      | CTCCGAATCATGTTG  |
| ADT_A0159 | L243           | HLA-DR                | 159     | AATAGCGAGCAAGTA  |
| ADT_A0149 | HP-3G10        | CD161                 | 149     | GTACGCGCTCTTCT   |
| ADT_A0080 | RPA-T8         | CD8a                  | 80      | GCTGCGCTTCCATT   |
| ADT_A0050 | HIB19          | CD19                  | 50      | CTGGGCAATTACTCG  |
| ADT_A0140 | G025H7         | CD183                 | 140     | GCGATGGTAGATTAT  |
| ADT_A0352 | AER-37 (CRA-1) | Fc epsilon RI alpha   | 352     | CTCGTTTCCGTATCG  |
| ADT_A0148 | G043H7         | CD197 (CCR7)          | 148     | AGTTCAGTCAACCGA  |
| ADT_A0083 | 3G8            | CD16                  | 83      | AAGTTCACTCTTTGC  |
| ADT_A0375 | M1310G05       | IgG Fc                | 375     | CTGGAGCGATTAGAA  |
| ADT_A0070 | GoH3           | CD49f                 | 70      | TTCCGAGGATGATCT  |
| ADT_A0423 | 590H11G1E3     | MERTK                 | 423     | TCCTGCATGTACCCA  |
| ADT_A0100 | 2H7            | CD20                  | 100     | TTCTGGGTCCTAGA   |
| ADT_A0088 | EH12.2H7       | CD279 (PD-1)          | 88      | ACAGCGCCGTATTTA  |
| ADT_A0132 | AY13           | EGFR                  | 132     | GCTTAACATTGGCAC  |
| ADT_A0063 | HI100          | CD45RA                | 63      | TCAATCCTTCCGCTT  |
| ADT_A0236 | RTK2071        | IgG1, k Isotype Ctrl  | 236     | ATCAGATGCCCTCAT  |
| ADT_A0143 | G034E3         | CD196                 | 143     | GATCCCTTTGTCACT  |
| ADT_A0126 | clone 7        | CD133                 | 126     | TGGTAACGACAGTCC  |
| ADT_A0188 | ASL-32         | CD66a/c/e             | 188     | GGGACAGTTCGTTTTC |
| ADT_A0367 | TS1/8          | CD2                   | 367     | TACGATTTGTCAGGG  |
| ADT_A0240 | RTK4174        | IgG2c, k Isotype Ctrl | 240     | TCCAGGCTAGTCATT  |
| ADT_A0101 | 9E2            | CD335                 | 101     | ACAATTTGAACAGCG  |
| ADT_A0205 | 15-2           | CD206 (MMR)           | 205     | TCAGAACGCTAACT   |
| ADT_A0123 | 9C4            | CD326 (Ep-CAM)        | 123     | TTCCGAGCAAGTATC  |
| ADT_A0206 | 7-239          | CD169                 | 206     | TACTCAGCGTGTITG  |
| ADT_A0353 | HIP8           | CD41                  | 353     | ACGTTGTGGCCTTGT  |
| ADT_A0371 | P1E6-C5        | CD49b                 | 371     | GCTTTCTTCAGTATG  |
| ADT_A0370 | 201A           | CD303                 | 370     | GAGATGTCCGAATTT  |
| ADT_A0369 | TS2/16         | CD29                  | 369     | GTATCCCTCAGTCA   |
| ADT_A0366 | 12G5           | CD184 (CXCR4)         | 366     | TCAGGTCCTTTCAAC  |
| ADT_A0374 | MEM-108        | CD98                  | 374     | GCACCAACAGCCATT  |
| ADT_A0363 | G077F6         | CD124                 | 363     | CCGTCTGATAGATG   |
| ADT_A0199 | 7C9            | Siglec-8              | 199     | CTTCTCCTCAGCAAT  |
| ADT_A0362 | 7D4-6          | CD309/VEGFR2          | 362     | TTCACGCAGTAAGAT  |
| ADT_A0357 | CD43-10G7      | CD43                  | 357     | GATTAACCAGCTCAT  |
| ADT_A0351 | BV10A4H2       | CD135 (Flt-3/Flk-2)   | 351     | CAGTAGATGGAGCAT  |
| ADT_A0207 | 8F9            | CD370 (CLEC9A/DNGR1)  | 207     | CTGCATTTAGTAAG   |
| ADT_A0196 | HIR2           | CD235ab               | 196     | GCTCCTTACACGTA   |
| ADT_A0181 | Bu32           | CD21                  | 181     | AACCTAGTAGTTCCG  |
| ADT_A0176 | A1             | CD39                  | 176     | TTACCTGGTATCCGT  |
| ADT_A0163 | M80            | CD141                 | 163     | GGATAACCGCGCTTT  |
| ADT_A0162 | 10.1           | CD64                  | 162     | AAGTATGCCCTACGA  |
| ADT_A0359 | HB15e          | CD83                  | 359     | CCACTCATTTCCGGT  |
| ADT_A0372 | VI-PL2         | CD61                  | 372     | AGGTTGGAGTAGACT  |
| ADT_A0358 | GHI/61         | CD163                 | 358     | GCTTCTCCTTCTTA   |
| ADT_A0360 | 108-17         | CD357 (GITR)          | 360     | ACCTTTCGACACTCG  |
| ADT_A0373 | 5A6            | CD81                  | 373     | GTATCCTTCTTGGC   |
| ADT_A0169 | F38-2E2        | CD366 (Tim-3)         | 169     | TGTCCTACCCAACCT  |
| ADT_A0168 | QA17A04        | CD57                  | 168     | AACTCCCTATGGAGG  |
| ADT_A0171 | C398.4A        | CD278 (ICOS)          | 171     | CGCGCACCCATTA    |
| ADT_A0156 | DX2            | CD95                  | 156     | CCAGCTCATTAGAGC  |
| ADT_A0146 | FN50           | CD69                  | 146     | GTCTCTTGGCTTAAA  |

|           |            |                              |     |                  |
|-----------|------------|------------------------------|-----|------------------|
| ADT_A0005 | 2D10       | CD80                         | 5   | ACGAATCAATCTGTG  |
| ADT_A0055 | MI15       | CD138                        | 55  | ACTCTTTTCGTTTACG |
| ADT_A0027 | 113-16     | CD70                         | 27  | CGCGAACATAAGAAG  |
| ADT_A0069 | RCR-401    | CD201 (EPCR)                 | 69  | GTTTCCTTGACCAAG  |
| ADT_A0136 | MHM-88     | IgM                          | 136 | TAGCGAGCCCGTATA  |
| ADT_A0361 | p282 (H19) | CD59                         | 361 | AATTAGCCGTGCGAGA |
| ADT_A0071 | L291H4     | CD194                        | 71  | AGCTTACCTGCACGA  |
| ADT_A0034 | UCHT1      | CD3                          | 34  | CTCATTGTAACCTCT  |
| ADT_A0046 | SK1        | CD8                          | 46  | GCGCAACTTGATGAT  |
| ADT_A0165 | 1D11       | CD314 (NKG2D)                | 165 | CGTGTGTTGTTCTCA  |
| ADT_A0006 | IT2.2      | CD86                         | 6   | GTCTTTGTCAGTGCA  |
| ADT_A0141 | J418F1     | CD195                        | 141 | CCAAAGTAAGAGCCA  |
| ADT_A0160 | L161       | CD1c                         | 160 | GAGCTACTTCACTCG  |
| ADT_A0386 | CD28.2     | CD28                         | 386 | TGAGAACGACCCTAA  |
| ADT_A0387 | 1D3        | TSLPR (TSLP-R)               | 387 | CAGTCCTCTCTGTCA  |
| ADT_A0023 | SKII.4     | CD155 (PVR)                  | 23  | ATCACATCGTTGCCA  |
| ADT_A0390 | A019D5     | CD127 (IL-7Ra)               | 390 | GTGTGTTGTCCTATG  |
| ADT_A0066 | CD7-6B7    | CD7                          | 66  | TGGATTCCCAGACTT  |
| ADT_A0061 | 104D2      | CD117                        | 61  | AGACTAATAGCTGAC  |
| ADT_A0062 | HI10a      | CD10                         | 62  | CAGCCATTATTAGG   |
| ADT_A0052 | P67.6      | CD33                         | 52  | TAACTCAGGGCCTAT  |
| ADT_A0029 | BJ40       | CD48                         | 29  | CTACGACGTAGAAGA  |
| ADT_A0024 | TX31       | CD112 (Nectin-2)             | 24  | AACCTTCCGTCTAAG  |
| ADT_A0073 | IM7        | CD44                         | 73  | TGGCTTCAGGTCCTA  |
| ADT_A0033 | HI186      | CD52                         | 33  | CTTTGTACGAGCAAA  |
| ADT_A0394 | CY1G4      | CD71                         | 394 | CCGTGTTCTCATTAT  |
| ADT_A0393 | S-HCL-1    | CD22                         | 393 | GGTTGTTGTCTTTG   |
| ADT_A0392 | W6D3       | CD15                         | 392 | TCACCAGTACCTAGT  |
| ADT_A0124 | WM59       | CD31                         | 124 | ACCTTTATGCCACGG  |
| ADT_A0081 | M5E2       | CD14                         | 81  | TCTCAGACCTCCGTA  |
| ADT_A0089 | A15153G    | TIGIT                        | 89  | TTGCTTACCGCCAGA  |
| ADT_A0102 | BM16       | CD294                        | 102 | TGTTTACGAGAGCCC  |
| ADT_A0048 | 2D1        | CD45                         | 48  | TCCCTTGCGATTTAC  |
| ADT_A0072 | RPA-T4     | CD4                          | 72  | TGTTCCCCTCAACT   |
| ADT_A0054 | 581        | CD34                         | 54  | GCAGAAATCTCCCTT  |
| ADT_A0189 | C1.7       | CD244 (2B4)                  | 189 | TCGTTGGATGGTAG   |
| ADT_A0047 | 5.1H11     | CD56                         | 47  | TCCTTTCTGATAGG   |
| ADT_A0144 | J252D4     | CD185                        | 144 | AATCAACCGTCGCC   |
| ADT_A0385 | TS1/18     | CD18                         | 385 | TATTGGGACACTTCT  |
| ADT_A0214 | FIB504     | integrin b7                  | 214 | TCCTTGGATGTACCG  |
| ADT_A0219 | GIR-208    | CD119 (IFN-g R a chain)      | 219 | TGTGTATTCCCTTGT  |
| ADT_A0131 | 16G5       | Cadherin 11                  | 131 | CGTTGCCATTAACCA  |
| ADT_A0180 | ML5        | CD24                         | 180 | AGATTCTTCGTGTT   |
| ADT_A0398 | 9-4D2-1E4  | CD115                        | 398 | AATCACGGTCCCTGT  |
| ADT_A0135 | 67A4       | CD324 (E-Cadherin)           | 135 | ATCCTTCTCCCTTTC  |
| ADT_A0164 | 51.1       | CD1d                         | 164 | TCGAGTCGCTTATCA  |
| ADT_A0242 | K036C2     | CD192                        | 242 | GAGTTCCTTACCTG   |
| ADT_A0172 | 9F.8A4     | CD275 (B7-H2, B7-RP1, ICOSL) | 172 | GTTAGTGTTAGCTTG  |
| ADT_A0068 | 43A3       | CD105                        | 68  | ATCGTCGAGAGCTAG  |
| ADT_A0400 | BV9        | CD144                        | 400 | TCCACTCATTCTGTA  |
| ADT_A0397 | 5E8        | CD193                        | 397 | ACCAATCCTTTTCGTC |
| ADT_A0383 | JS11       | CD55                         | 383 | GCTCATTACCCATTA  |
| ADT_A0187 | CB3-1      | CD79b                        | 187 | ATTCTTCAACCGAAG  |
| ADT_A0166 | 6/40c      | CD66b                        | 166 | AGCTGTAAGTTTCGG  |
| ADT_A0064 | 6H6        | CD123                        | 64  | CTTCACTGTGTCAGG  |
| ADT_A0053 | S-HCL-3    | CD11c                        | 53  | TACGCCTATAACTTG  |
| ADT_A0218 | AK4        | CD62P (P-Selectin)           | 218 | CCTTCCGTATCCCTT  |
| ADT_A0216 | HIP1       | CD42b                        | 216 | TCCTAGTACCGAAGT  |
| ADT_A0217 | HA58       | CD54                         | 217 | CTGATAGACTTGAGT  |
| ADT_A0428 | 9F4        | Tim-4                        | 428 | CGTCATATAGTATGG  |
| ADT_A0427 | 94b/FOLR2  | Folate Receptor beta         | 427 | TGTGGCTAGTCAGTT  |
| ADT_A0382 | MEM-166    | CD177                        | 382 | AGTATGGAGCCATAT  |
| ADT_A0245 | STA        | CD106                        | 245 | TCACAGTTCCTTGGA  |

|           |             |                            |     |                  |
|-----------|-------------|----------------------------|-----|------------------|
| ADT_A0233 | MHN3-21     | Notch 3                    | 233 | CTATTGGACGTATCT  |
| ADT_A0401 | H037G3      | CD301                      | 401 | ACCTAGAAATCAGCA  |
| ADT_A0404 | H5C6        | CD63                       | 404 | GAGATGTCTGCAACT  |
| ADT_A0248 | HAE-1f      | CD62E                      | 248 | CTCCCTGTGGCTTAA  |
| ADT_A0384 | IA6-2       | IgD                        | 384 | CAGTCTCCGTAGAGT  |
| ADT_A0419 | 3F3         | CD72                       | 419 | CAGTCGTGGTAGATA  |
| ADT_A0446 | VIMD2       | CD93                       | 446 | GCGCTACTTCCTTGA  |
| ADT_A0409 | 17G10.2     | CD85g (ILT7)               | 409 | TGTCAGTTCTATGA   |
| ADT_A0408 | 15-414      | CD172a                     | 408 | CGTGTTTAACTTGAG  |
| ADT_A0405 | HTA125      | CD284 (TLR4)               | 405 | GCTTAGCTGTATCCG  |
| ADT_A0406 | 12C2        | CD304                      | 406 | GGACTAAGTTTCGTT  |
| ADT_A0407 | 5-271       | CD36                       | 407 | TTCTTTGCCTTGCCA  |
| ADT_A0244 | CBR-IC2/2   | CD102                      | 244 | TGACCTTCCTCTCCT  |
| ADT_A0224 | IP26        | TCR alpha/beta             | 224 | CGTAACGTAGAGCGA  |
| ADT_A0246 | TU27        | CD122                      | 246 | TCATTTCTCCGATT   |
| ADT_A0237 | G0114F7     | IgG1, λ Isotype Ctrl       | 237 | GGGAGCGATTCAACT  |
| ADT_A0247 | 1A1         | CD267 (TACI)               | 247 | AGTGATGGAGCGAAC  |
| ADT_A0155 | H4A3        | CD107a                     | 155 | CAGCCCACTGCAATA  |
| ADT_A0134 | P1H12       | CD146                      | 134 | CCTTGATAACATCA   |
| ADT_A0213 | MHN1-519    | Notch 1                    | 213 | AATCTGTAGTGCGTT  |
| ADT_A0575 | TS2/7       | CD49a                      | 575 | ACTGATGGACTCAGA  |
| ADT_A0579 | HI9a        | CD9                        | 579 | GAGTCACCAATCTGC  |
| ADT_A0581 | 3C10        | TCR V alpha7.2             | 581 | TACGAGCAGTATTCA  |
| ADT_A0583 | B3          | TCR Vg9                    | 583 | AAGTGATGGTATCTG  |
| ADT_A0576 | 9F10        | CD49d                      | 576 | CCATTCAACTTCCGG  |
| ADT_A0572 | 1D9-M12     | C5L2                       | 572 | ACAATTTGTCTGCCA  |
| ADT_A0574 | HI264       | CD235a                     | 574 | AGAGATGTATGGGA   |
| ADT_A0569 | 5D3         | CD338 (ABCG2)              | 569 | TAAGACTTGCCCGTC  |
| ADT_A0577 | AD2         | CD73                       | 577 | CAGTTCCTCAGTTCG  |
| ADT_A0578 | HM47        | CD79a                      | 578 | CTTATCACCCGCTTT  |
| ADT_A0598 | S16017E     | CD110                      | 598 | TGTTGTAAGATGCCA  |
| ADT_A0597 | 9E9A8       | CD209 (DC-SIGN)            | 597 | TCACTGGACACTTAA  |
| ADT_A0410 | HB-7        | CD38                       | 410 | CCTATTCCGATTCCG  |
| ADT_A0447 | OX-104      | CD200                      | 447 | CACGTAGACCTTTGC  |
| ADT_A0592 | DX27        | CD158b (KIR2DL2/L3, NKAT2) | 592 | GACCCGTAGTTTGAT  |
| ADT_A0805 | TX25        | CD226 (DNAM-1)             | 805 | AGACCAACTCATTCA  |
| ADT_A0804 | K041E5      | CD186                      | 804 | GACAGTCGATGCAAC  |
| ADT_A0600 | UP-R1       | CD158f                     | 600 | AAAGTGATGCCACTG  |
| ADT_A0599 | DX9         | CD158e1 (KIR3DL1, NKB1)    | 599 | GGACGCTTTCTTGA   |
| ADT_A0364 | WM15        | CD13                       | 364 | TTTCAACGCCCTTTC  |
| ADT_A0586 | TREM-26     | CD354                      | 586 | TAGCCGTTTCTTTG   |
| ADT_A0582 | B6          | TCR Vd2                    | 582 | TCAGTCAGATGGTAT  |
| ADT_A0588 | 33.1 (Ab33) | CD202b (Tie2/Tek)          | 588 | CGATCCCTTACCTAT  |
| ADT_A0175 | NK92.39     | CD96                       | 175 | TGGCCTATAAATGGT  |
| ADT_A0420 | HP-MA4      | CD158                      | 420 | TATCAACCAACGCTT  |
| ADT_A0801 | P30-15      | CD337 (NKp30)              | 801 | AAAGTCACTCTGCCG  |
| ADT_A0820 | 2E1B02      | CD130                      | 820 | CACGAGAATTTTCAGT |
| ADT_A0822 | NY2         | CD142                      | 822 | CACTGCCGTCGATTA  |
| ADT_A0829 | 509f6       | CD307                      | 829 | TCACGCAGTCTCAA   |
| ADT_A0830 | 162.1       | CD319 (CRACC)              | 830 | AGTATGCCATGTCTT  |
| ADT_A0821 | 67D2        | CD164                      | 821 | GAGGCACCTAACATA  |
| ADT_A0814 | HD30        | CD205 (DEC-205)            | 814 | CTATCGTTTGATGCA  |
| ADT_A0026 | CC2C6       | CD47                       | 26  | GCATTCTGTACCTA   |
| ADT_A0590 | NKTA255     | CD305                      | 590 | ATTTCCATTCCCTGT  |
| ADT_A0433 | 8C11        | CD325                      | 433 | CCTTCCCTTTCTCT   |
| ADT_A0819 | UV4         | CD126                      | 819 | TGATGGGAGCTTATC  |
| ADT_A0817 | W7C5        | CD109                      | 817 | CACTTAACTCTGGGT  |
| ADT_A0591 | 15C4        | LOX-1                      | 591 | ACCCTTTACCGAATA  |
| ADT_A0853 | 50C1        | CD371 (CLEC12A)            | 853 | CATTAGAGTCTGCCA  |
| ADT_A0845 | 3B2/TA8     | CD99                       | 845 | ACCCGTCCCTAAGAA  |
| ADT_A0060 | 5E10        | CD90 (Thy1)                | 60  | GCATTGTACGATTCA  |
| ADT_A0844 | MEM-55      | CD45RB                     | 844 | AGATGGGACTCACCA  |
| ADT_A0858 | TRA-2-10    | CD46                       | 858 | ACAGTACGACCTTCT  |

|           |           |                                   |     |                 |
|-----------|-----------|-----------------------------------|-----|-----------------|
| ADT_A0866 | AYP1      | CLEC1B                            | 866 | TGCCAGTATCACGTA |
| ADT_A0008 | 24F.10C12 | CD273                             | 8   | TCAACGCTTGGCTAG |
| ADT_A0170 | MIH26     | BTLA                              | 170 | GTTATTGGACTAAGG |
| ADT_A0138 | UCHT2     | CD5                               | 138 | CATTAACGGGATGCC |
| ADT_A0154 | O323      | CD27                              | 154 | GCACTCCTGCATGTA |
| ADT_A0153 | SA231A2   | KLRG1                             | 153 | CTTATTCCTGCCCT  |
| ADT_A0931 | 1C1       | CD131                             | 931 | CTGCATGAGACCAAA |
| ADT_A0920 | ASL-24    | CD82                              | 920 | TCCCACTTCCGCTTT |
| ADT_A0934 | HSL96     | CD179a                            | 934 | TAGATGGGATTCCGG |
| ADT_A0935 | LN2       | CD74                              | 935 | CTGTAGCATTTCCT  |
| ADT_A0932 | 31G4D8    | Lymphotoxin b Receptor<br>(LT-bR) | 932 | CCTCTATTCAGAGCA |

**Table S8. List of antibodies used for mass cytometry.**

| Antigen                | Conjugate | Clone                   | Company     | Cat #         |
|------------------------|-----------|-------------------------|-------------|---------------|
| CD2                    | Biotin    | RPA-2.10                | eBioscience | 13-0029-82    |
| CD3                    | Biotin    | OKT3                    | eBioscience | 13-0037-82    |
| CD4                    | Biotin    | RPA-T4                  | eBioscience | 13-0049-82    |
| CD7                    | Biotin    | eBio124-1D1 (124-1D1)   | eBioscience | 13-0079-82    |
| CD8a                   | Biotin    | HIT8a                   | eBioscience | 13-0089-82    |
| CD10                   | Biotin    | eBioCB-CALLA (CB-CALLA) | eBioscience | 13-0106-82    |
| CD11b                  | Biotin    | ICRF44                  | eBioscience | 13-0118-82    |
| CD14                   | Biotin    | 61D3                    | eBioscience | 13-0149-82    |
| CD19                   | Biotin    | HIB19                   | eBioscience | 13-0199-82    |
| CD20                   | Biotin    | 2H7                     | eBioscience | 13-0209-82    |
| CD56                   | Biotin    | CMSSB                   | eBioscience | 13-0567-82    |
| CD41                   | 89Y       | HIP8                    | Fluidigm    | 3089004B      |
| CD45                   | 141Pr     | HI30                    | Fluidigm    | 3141009B      |
| p-AMPKa (Thr172)       | 142Nd     | 40H9                    | CST         | 2535S         |
| CD123                  | 143Nd     | 6H6                     | Fluidigm    | 3143014B      |
| CD38                   | 144Nd     | HIT2                    | Fluidigm    | 3144014B      |
| p53                    | 145Nd     | X77                     | abcam       | ab16465       |
| SOCS3                  | 146Nd     | 516919                  | R&D         | MAB5696       |
| p-Stat5 [Y694]         | 147Sm     | 47                      | Fluidigm    | 3147012A      |
| CD110 (C-MPL)          | 148Nd     | 1.78.1                  | BD          | 562137        |
| CD34                   | 149Sm     | 581                     | Fluidigm    | 3149013B      |
| HIF-1α                 | 150Nd     | H-206                   | Santa Cruz  | sc-10790      |
| GRIM19                 | 151Eu     | 6E1BH7                  | Abcam       | ab110240      |
| p-Akt [S473]           | 152Sm     | D9E                     | Fluidigm    | 3152005A      |
| p-Stat1 [Y701]         | 153Eu     | 58D6                    | Fluidigm    | 3153003A      |
| Nrf2 [EP1808Y]         | 154Sm     | EP1808Y                 | Abcam       | ab62352       |
| CD45RA                 | 155Gd     | HI100                   | Fluidigm    | 3155011B      |
| p38 [T180/Y182]        | 156Gd     | D3F9                    | Fluidigm    | 3156002A      |
| p-Stat3 [Y705]         | 158Gd     | 4/P-Stat3               | Fluidigm    | 3158005A      |
| p-MAPKAPK2 [T334]      | 159Tb     | 27B7                    | Fluidigm    | 3159010A      |
| Nrf1                   | 160Gd     | EPR5554(N)              | Abcam       | ab175932      |
| p-Jak2 (Tyr1008)       | 161Dy     | D4A8                    | CST         | 8082S         |
| Ki-67                  | 162Dy     | B56                     | Fluidigm    | 3162012B      |
| mTOR (phospho S2448)   | 163Dy     | EPR426(2)               | Abcam       | ab109268      |
| LKB1 (phospho S428)    | 164Dy     | polyclonal              | Abcam       | ab63473       |
| pNF-kB p65 [S529]      | 166Er     | K10895.12.50            | Fluidigm    | 3166006A      |
| Hepcidine              | 167Er     | 1F9                     | Abnova      | H00057817-M02 |
| CD71                   | 168Er     | CY1G4                   | biolegend   | 334102        |
| vWF                    | 169Tm     | polyclonal              | Abcam       | ab11713       |
| Biotin                 | 170Er     | 1D4C5                   | Fluidigm    | 3170003B      |
| pERK1/2 [T202/Y204]    | 171Yb     | D13.14.4E               | Fluidigm    | 3171010A      |
| Anti-Cleaved Caspase 3 | 172Yb     | 5A1E                    | Fluidigm    | 3172023A      |
| CD90                   | 173Yb     | 5.00E+10                | Fluidigm    | 3173011B      |
| PF4                    | 174Yb     | 170138                  | R&D         | MAB7952       |
| PGC-1                  | 175Lu     | polyclonal              | Merck       | AB3242        |

**Table S9. Numbers of cells submitted for scRNA-seq, and after first steps of quality control prior to further downstream bioinformatics analyses.**

| Donor    | Tissue | 10x scRNA-seq and CITE-seq of CD19 <sup>+</sup> CD34 <sup>+</sup> HSCPs |                 |              | Smart-seq2 of phenotypic HSC/MPPs |                                                          |                                                         |
|----------|--------|-------------------------------------------------------------------------|-----------------|--------------|-----------------------------------|----------------------------------------------------------|---------------------------------------------------------|
|          |        | Cells submitted                                                         | Cells recovered | Recovery [%] | Cells submitted                   | Cells passing QC prior to calculation of identity scores | Number of cells passing QC/removal outliers prior DSeq2 |
| OD1      | BM     | 15,032                                                                  | 5,753           | 38.27        | 190                               | 129                                                      | 104                                                     |
| OD1      | PB     | 7,516                                                                   | 2,607           | 34.69        | -                                 | -                                                        | -                                                       |
| OD1      | SPL    | 15,032                                                                  | 5,295           | 35.22        | 190                               | 165                                                      | 150                                                     |
| OD2      | BM     | 17,500                                                                  | 6,216           | 35.52        | 272                               | 242                                                      | 232                                                     |
| OD2      | PB     | 17,500                                                                  | 6,528           | 37.30        | 91                                | 87                                                       | NA                                                      |
| OD2      | SPL    | 15,011                                                                  | 5,026           | 33.48        | 92                                | 74                                                       | 60                                                      |
| OD3      | BM     | 25,000                                                                  | 12,590          | 50.36        | -                                 | -                                                        | -                                                       |
| OD4      | BM     | 30,000                                                                  | 15,364          | 51.21        | -                                 | -                                                        | -                                                       |
| OD4      | SPL    | 30,000                                                                  | 14,264          | 47.55        | -                                 | -                                                        | -                                                       |
| LD1      | PB     | 12,471                                                                  | 5,174           | 41.49        | -                                 | -                                                        | -                                                       |
| LD2      | PB     | 17,500                                                                  | 5,921           | 33.83        | -                                 | -                                                        | -                                                       |
| LD3      | PB     | 17,500                                                                  | 5,439           | 31.08        | -                                 | -                                                        | -                                                       |
| LD4      | PB     | 17,500                                                                  | 7,325           | 41.86        | -                                 | -                                                        | -                                                       |
| LD5      | PB     | 30,000                                                                  | 13,838          | 46.13        | -                                 | -                                                        | -                                                       |
| LD6      | PB     | 30,000                                                                  | 18,025          | 60.08        | -                                 | -                                                        | -                                                       |
| mPB1     | mPB    | 15,000                                                                  | 8,220           | 54.80        | -                                 | -                                                        | -                                                       |
| mPB2     | mPB    | 15,000                                                                  | 7,038           | 46.92        | -                                 | -                                                        | -                                                       |
| mPB3     | mPB    | 15,000                                                                  | 5,982           | 39.88        | -                                 | -                                                        | -                                                       |
| mPB4     | mPB    | 15,000                                                                  | 6,786           | 45.24        | -                                 | -                                                        | -                                                       |
| HS SPL 1 | SPL    | 15,000                                                                  | 5,034           | 33.56        | -                                 | -                                                        | -                                                       |
| HS SPL 2 | SPL    | 15,000                                                                  | 4,905           | 32.70        | -                                 | -                                                        | -                                                       |

# SUPPLEMENTAL FIGURES

Figure S1

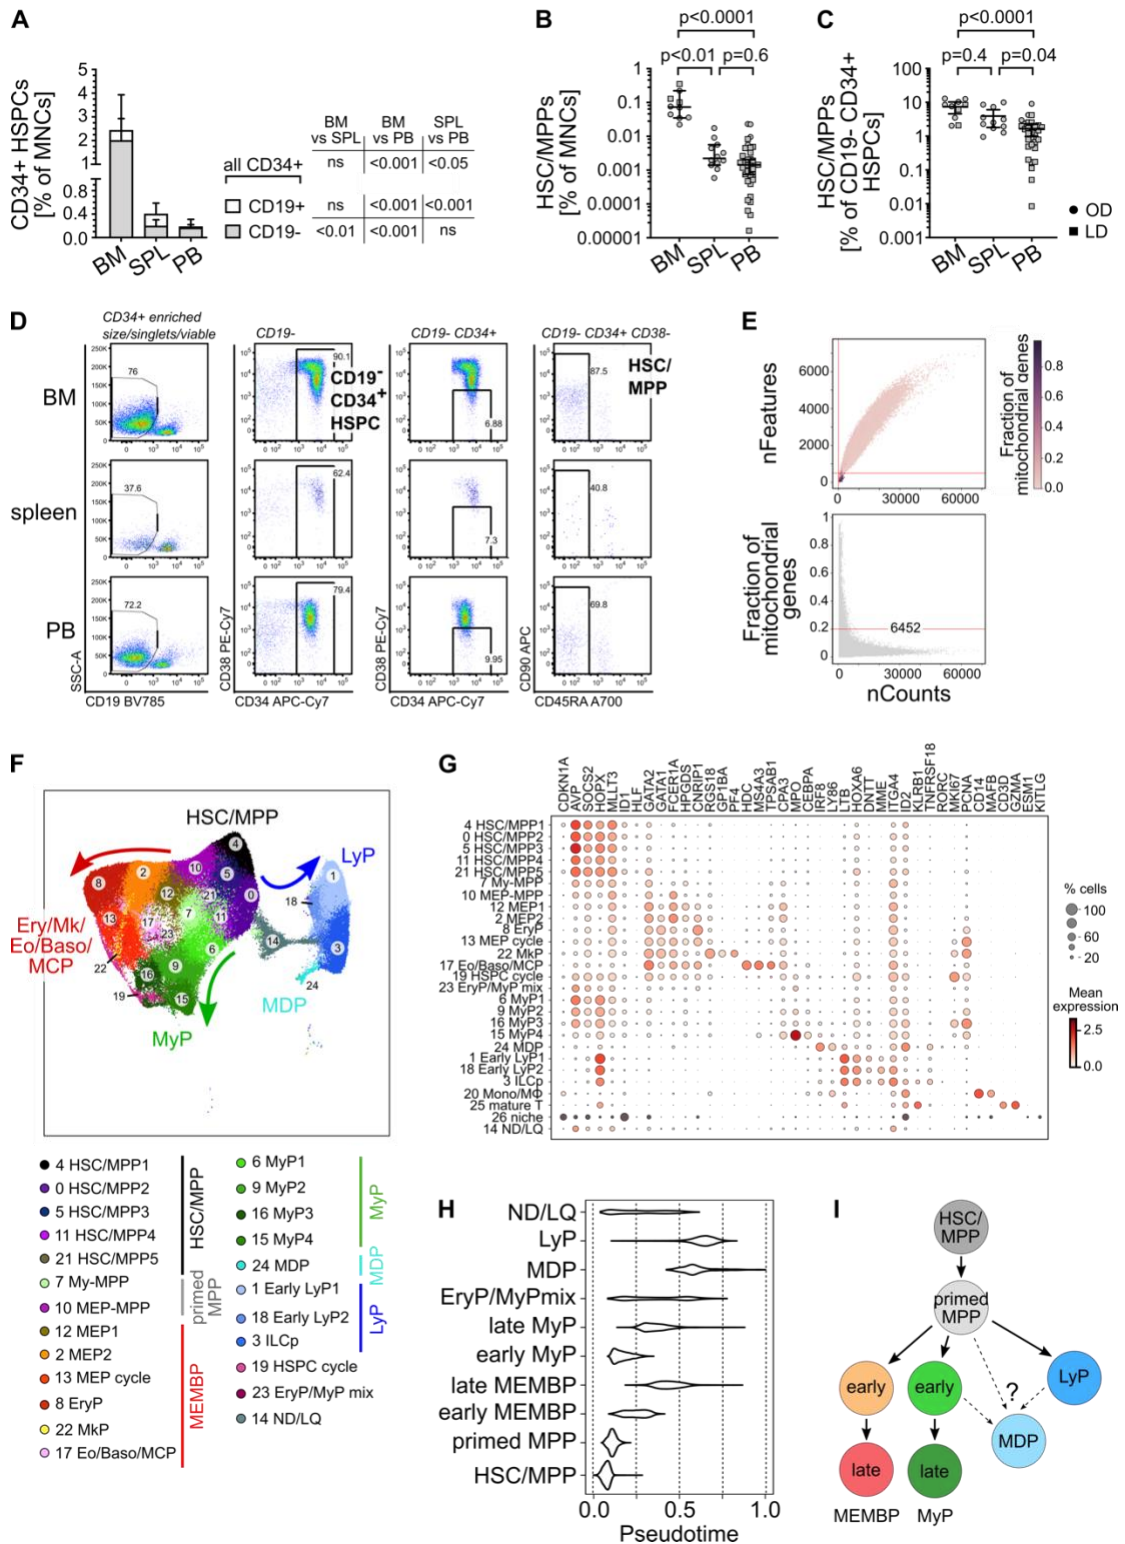

Figure S1. The adult human HSPC landscape across BM, PB and spleen. Related to Figure 1. (A) Stacked bar graph showing the frequencies of CD19<sup>-</sup>CD34<sup>+</sup> and CD19<sup>+</sup>CD34<sup>+</sup> HSPCs in BM (n=9), PB (n=31), spleen (n=10) over 29 experiments.



Mean  $\pm$  SD is shown. **(B-C)** Frequencies of phenotypic HSC/MPPs (CD19<sup>-</sup>CD34<sup>+</sup>CD38<sup>-</sup>CD45RA<sup>-</sup>) in mononuclear cells (MNCs **(B)** and CD19<sup>-</sup>CD34<sup>+</sup> HSPCs **(C)** from BM (n=10), PB (n=30) and spleen (n=11) over 29 experiments. Median  $\pm$  95% confidence is shown. **(D)** Gating strategy for the purification of CD19<sup>-</sup>CD34<sup>+</sup> HSPCs and CD19<sup>-</sup>CD34<sup>+</sup>CD38<sup>-</sup>CD45RA<sup>-</sup> HSC/MPPs from all three tissues. Representative plots from OD1 are shown. **(E)** Feature plots of 10x Genomics scRNA-seq data combining BM, spleen and non-mobilized PB. Red lines indicate the thresholds used for the cut-off of nFeatures, nCounts and mitochondrial gene content. 6,452 cells were removed due to a mitochondrial gene content > 20%. **(F)** UMAP of the multisite HSPC landscape after exclusion of mature cells (see methods). Colors and numbers indicate clusters of transcriptionally distinct cells as defined by Leiden clustering. Clusters were annotated using known lineage and stem cell marker genes found amongst the most differentially expressed genes in each cluster (Table S2a). ND/LQ: cluster of low quality for which identity could not be defined using known marker genes. HSC/MPP: hematopoietic stem cell/multipotent progenitor; MEP: Megakaryocyte-erythroid progenitor; EryP: erythroid progenitor; MkP: megakaryocytic progenitor; Eo/Baso/MCP: eosinophil/basophil/mast cell progenitor; MEMBP: Megakaryocyte/erythroid/eosinophil/mast cell/basophil progenitor; MyP: myeloid progenitor; MDP: monocyte/dendritic cell progenitor; LyP: lymphoid progenitor; ILCp: Innate lymphoid cell progenitor. **(G)** Expression values of selected marker genes for all Leiden clusters (as in F above) in the HSPC landscape combining all donors and all tissues. Circle color shows mean scaled expression values and circle size represents the proportion of expressing cells per cluster. **(H)** Pseudotime was assigned to each cell of the HSPC landscape choosing a cell in cluster 4 (HSC/MPP1) as the root. Violin plots of the pseudotime value for each HSPC group is shown. HSPC groups were defined as shown in Figure 1A and Table S2c. **(I)** Schematic differentiation hierarchy of the HSPC group as defined in Table S2c. A-C) Kruskal-Wallis; Dunn's multiple comparison test. LD; living donor, OD; organ donor, SPL; spleen.

**Figure S2**

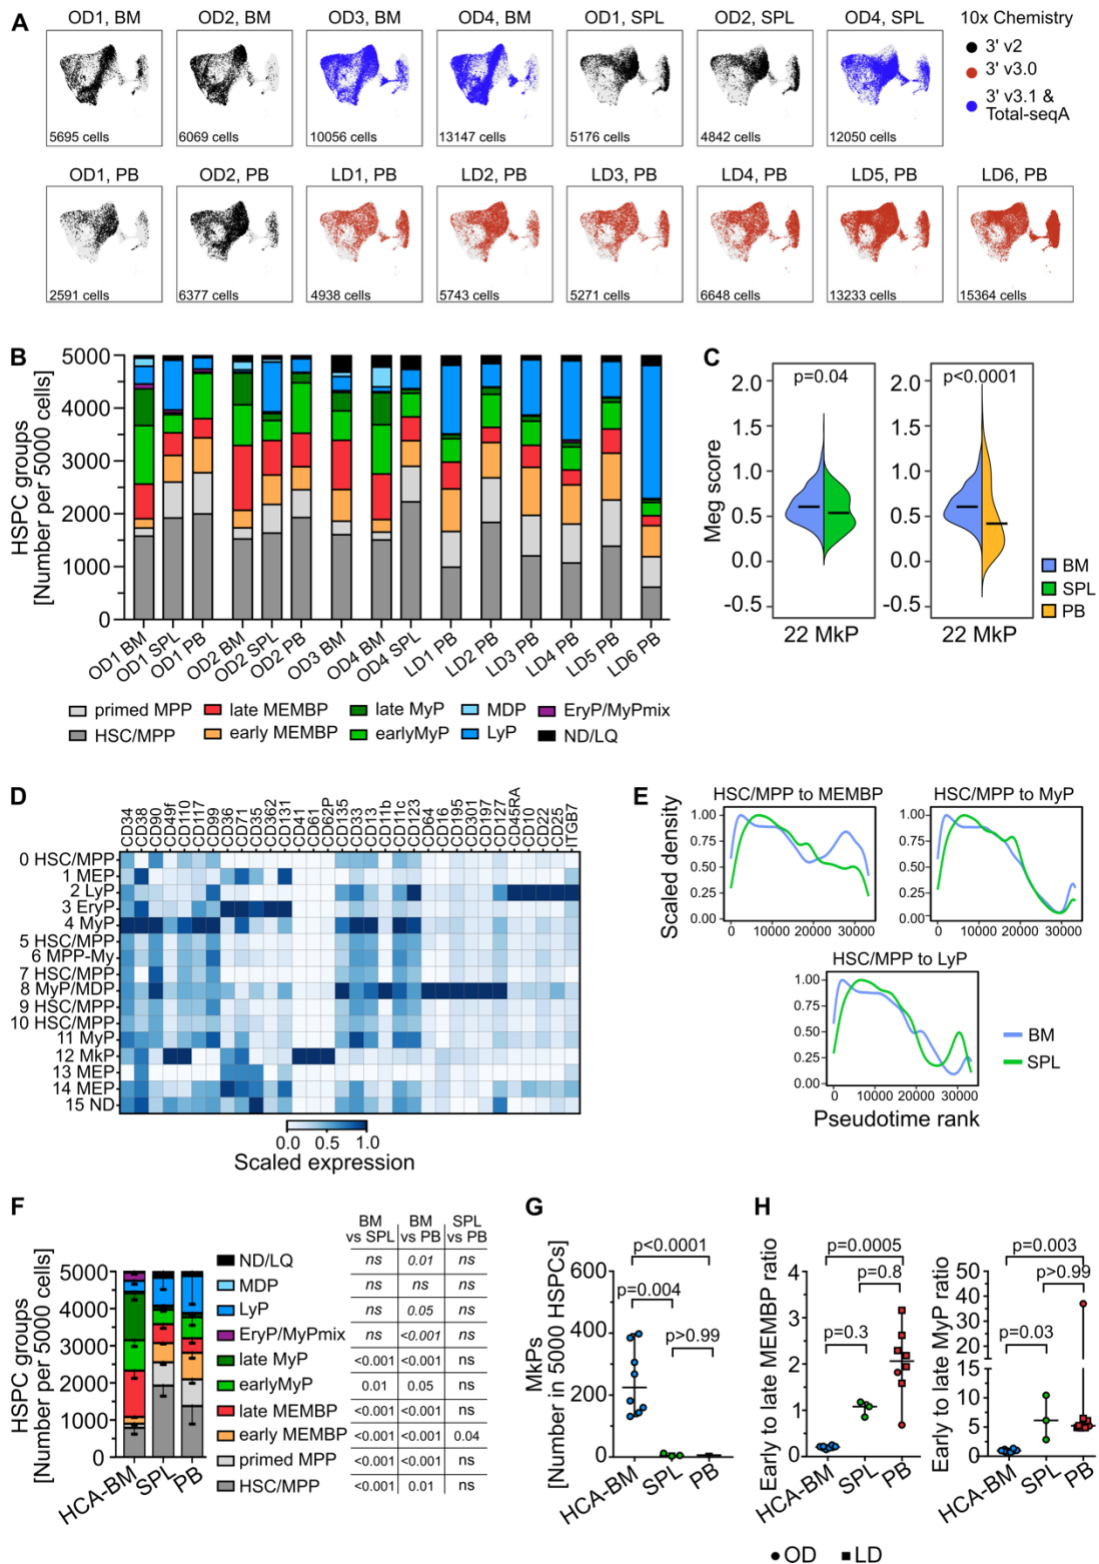

**Figure S2. Changes in HSPC composition between BM, PB and spleen.** Related to Figure 2. **(A-G)** Analysis of 10x Genomics scRNA-seq and CITE-seq data combining all donors but comparing different tissues. **(A)** UMAPs of the HSPC landscape for each individual donor and tissue, colored by the version of 10x reagents used for scRNA-

seq and CITE-seq library preparation. The number of single cells from each donor and tissue is indicated in each plot. **(B)** Bar graphs of the relative proportion of each HSPC group in each individual donor (same data as in Figure 2B). **(C)** Split violin plots of the Meg-lineage priming scores in cluster 22 (MkPs) comparing BM with spleen or PB. Median is shown (solid line).  $38 \leq \text{single cells} \leq 491$ . Mann-Whitney test. **(D)** Heatmap of cell surface protein expression for each Leiden cluster using exclusively the CITE-Seq protein data from two BMs (OD3: 9,477 cells, OD4: 12,500 cells) and one spleen (OD4: 11,822 cells). **(E)** Pseudotime rank of CITE-seq protein data for each lineage branch (starting with HSC/MPPs) comparing BM and spleen. **(F-H)** Comparison of spleen and PB from our multi-tissue landscape to the benchmark Human Cell Atlas (BM) BM reference<sup>31</sup>. **(F)** Bar graph of the relative composition of HSPC groups in HCA-BM, PB and spleen. Mean  $\pm$  SD is shown. **(G)** Relative number of MkPs (cluster 22) in each tissue. **(H)** The ratio of early to late progenitors of the MEMB (left) or My (right) branch is shown. F,G) One-way ANOVA with post hoc Tukey test, except for LyP, EryP/MyPmix and ND/LQ clusters in (F) (not normally distributed, italic letters), for which a Kruskal-Wallis test with Dunn's multiple comparison was used. ns;  $p > 0.05$ . H) Kruskal-Wallis test with Dunn's multiple comparison. G,H) Median  $\pm$  95% confidence is shown. LD; living donor, OD; organ donor, SPL; spleen.

**Figure S3**

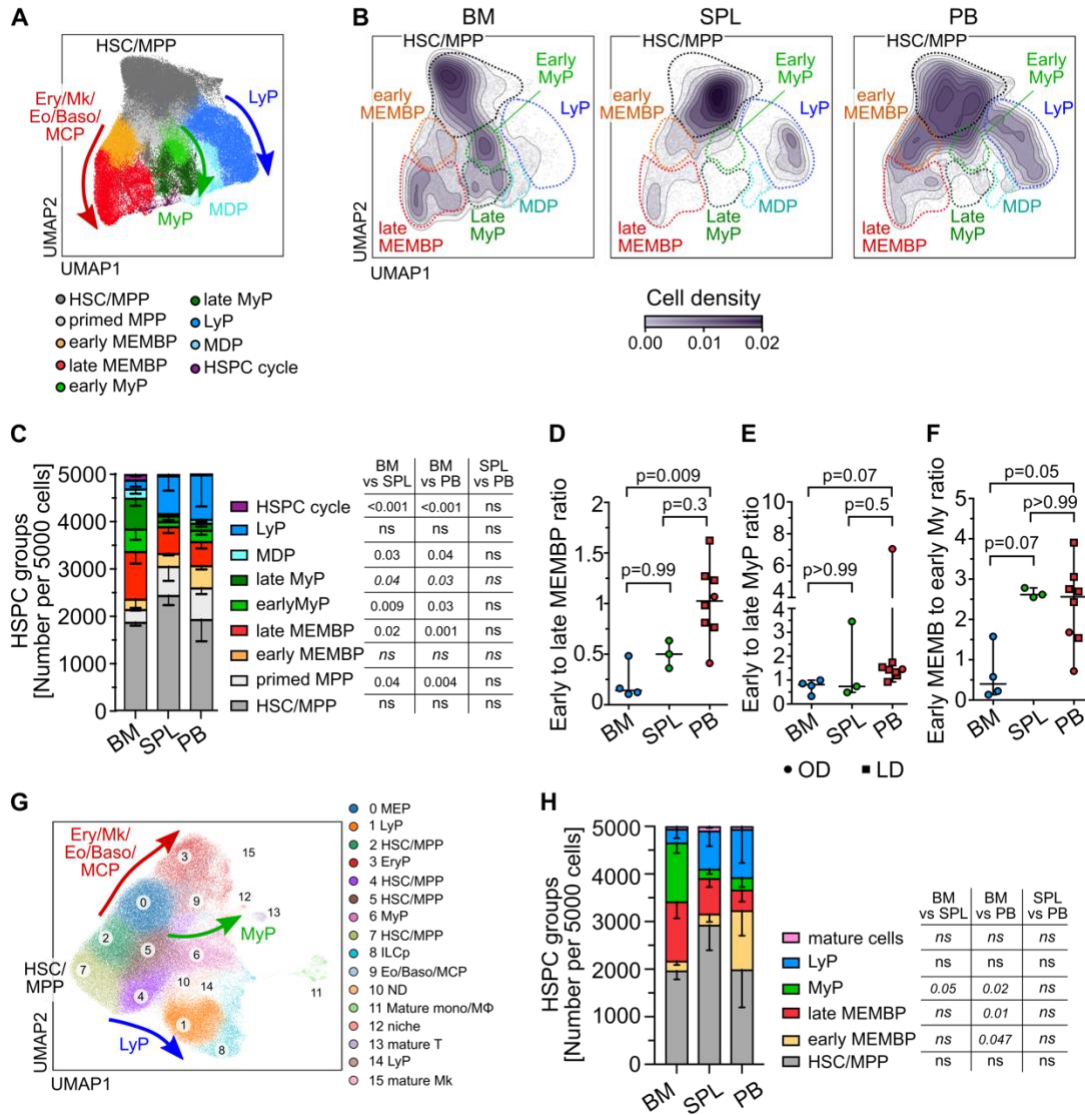

**Figure S3. Analysis of BM, spleen and PB scRNA-seq data using cell cycle regression and ComBat batch correction.** Related to Figure 2. **(A-F)** Analysis of 10x Genomics scRNA-seq data (same as in Figure 2) after regression of cell cycle genes. **(A)** UMAP of the multisite HSPC landscape. Clusters with similar cell identity are shown as HSPC groups, as indicated by cluster colors. **(B)** Density of cells across the UMAP coordinates of each tissue, displayed as contours filled by a color gradient. **(C)** Bar graph of the relative composition of HSPC groups in BM, spleen and PB. **(D,E)** The ratio of early to late progenitors of the MEMB **(D)** or My **(E)** branch is shown. **(F)** Ratio of early MEMBP to early MyP clusters. **(G-H)** ComBat batch correction was used as an alternative method to Seurat to integrate the 10x datasets of all donors, combining all tissues. **(G)** Annotated UMAP of the HSPC landscape after ComBat correction. Colors and numbers indicate clusters of transcriptionally distinct cells as partitioned by Leiden clustering. **(H)** HSPC group composition after ComBat correction

comparing BM, spleen and PB. C,H) Mean  $\pm$  SD is shown. One-way ANOVA with post hoc Tukey test, except for not normally distributed clusters (indicated by italic text), for which a Kruskal-Wallis test with Dunn's multiple comparison was used. ns;  $p > 0.05$ . D,E,F) Median  $\pm$  95% confidence is shown. Kruskal-Wallis; Dunn's multiple comparison test. LD: living donor, OD: organ donor, SPL: spleen.

**Figure S4**

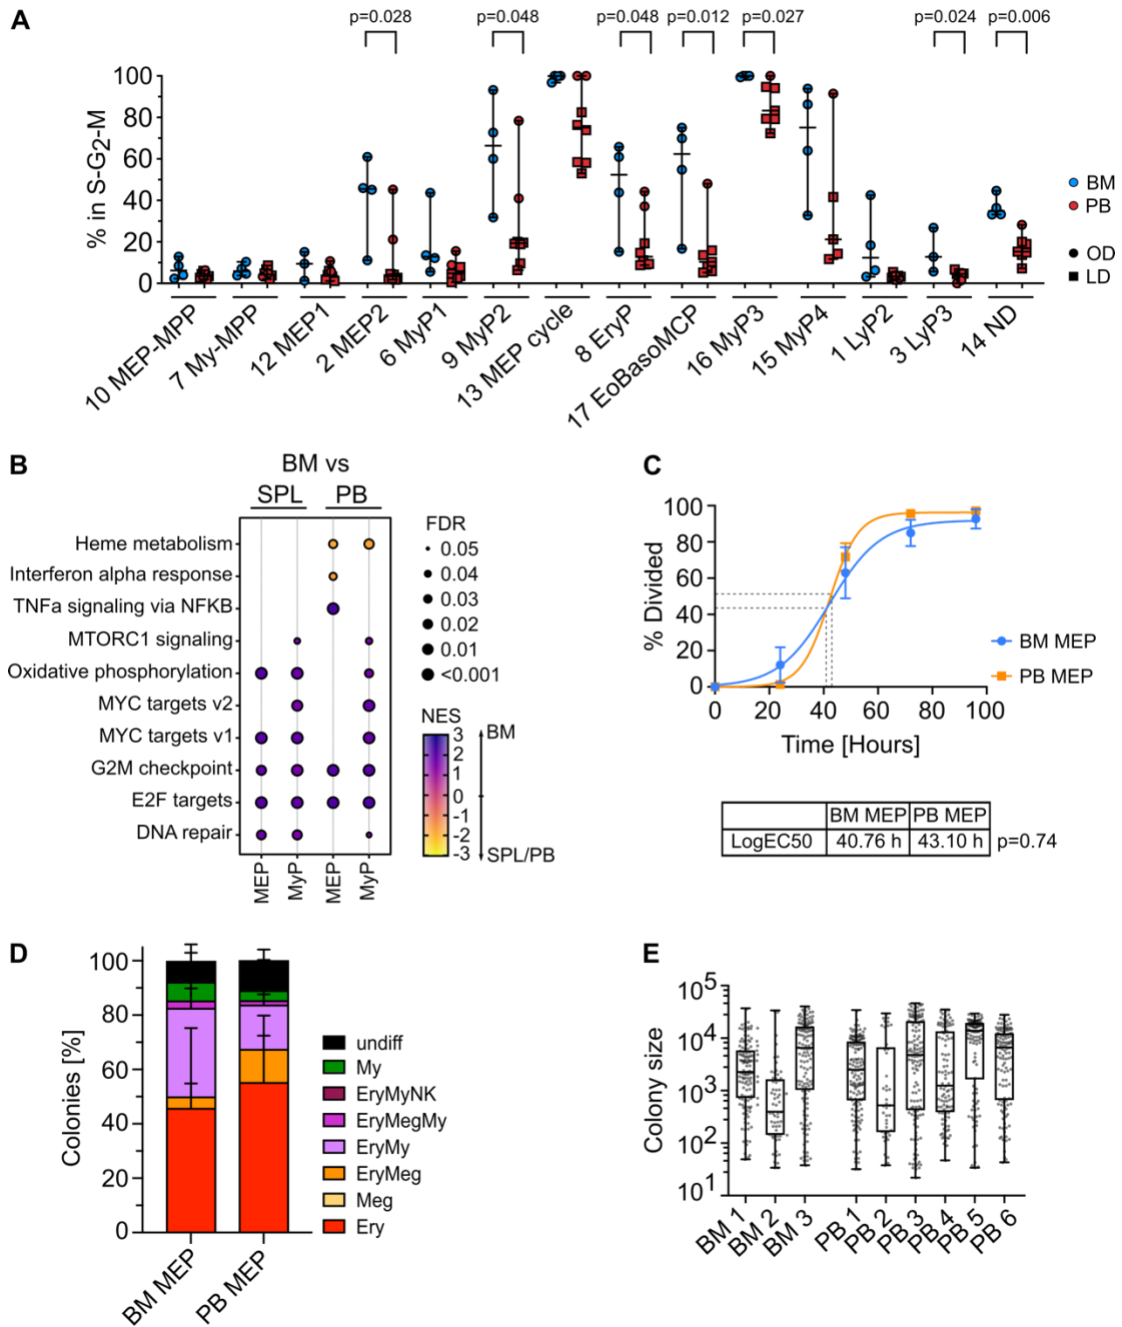

**Figure S4. Low to no cycling activity of HSPCs in extramedullary sites.** Related to Figure 3. **(A)** Percentage of cells in S-G<sub>2</sub>-M phase (assigned by cell cycle phase scoring as described by <sup>11</sup>) for each progenitor cluster comparing unmatched BM and PB. Median  $\pm$  95% confidence is shown. LD; living donor, OD; organ donor. Two-tailed Mann-Whitney test. **(B)** Selected pathways (MSigDB hallmark) enriched in early progenitors of the MEMB (MEP: cluster 2,10,12) and My branch (MyP: cluster 6,7,9) comparing BM with spleen or BM with PB. All enriched pathways are summarized in Table S4b-e. **(C-E)** Single sorter purified CD19<sup>-</sup>CD34<sup>+</sup>CD38<sup>+</sup>CD123<sup>-</sup>CD45RA<sup>-</sup> MEPs

from BM (n=317 single cells from 3 donors) and PB (n=655 single cells from 6 donors) were cultured for 2 weeks in medium promoting My, Ly, Ery and Meg differentiation. Five independent experiments were performed. **(C)** Time to first division kinetics (counted for the first 4 days, excluding dead cells) comparing BM MEPs as PB MEPs. Curve is least-squares sigmoid fit. Estimated time to first division (logEC50) is indicated by dashed gray lines, p is by extra sum of squares F-test. **(D)** Colony composition after 2 weeks culture of BM MEPs and PB MEPs. Mean  $\pm$  SD is shown. All not significant with two-tailed Mann-Whitney test. **(E)** Box plots of colony size for each sample (box represents median and interquartile range). LD; living donor, OD; organ donor, SPL: spleen.

**Figure S5**

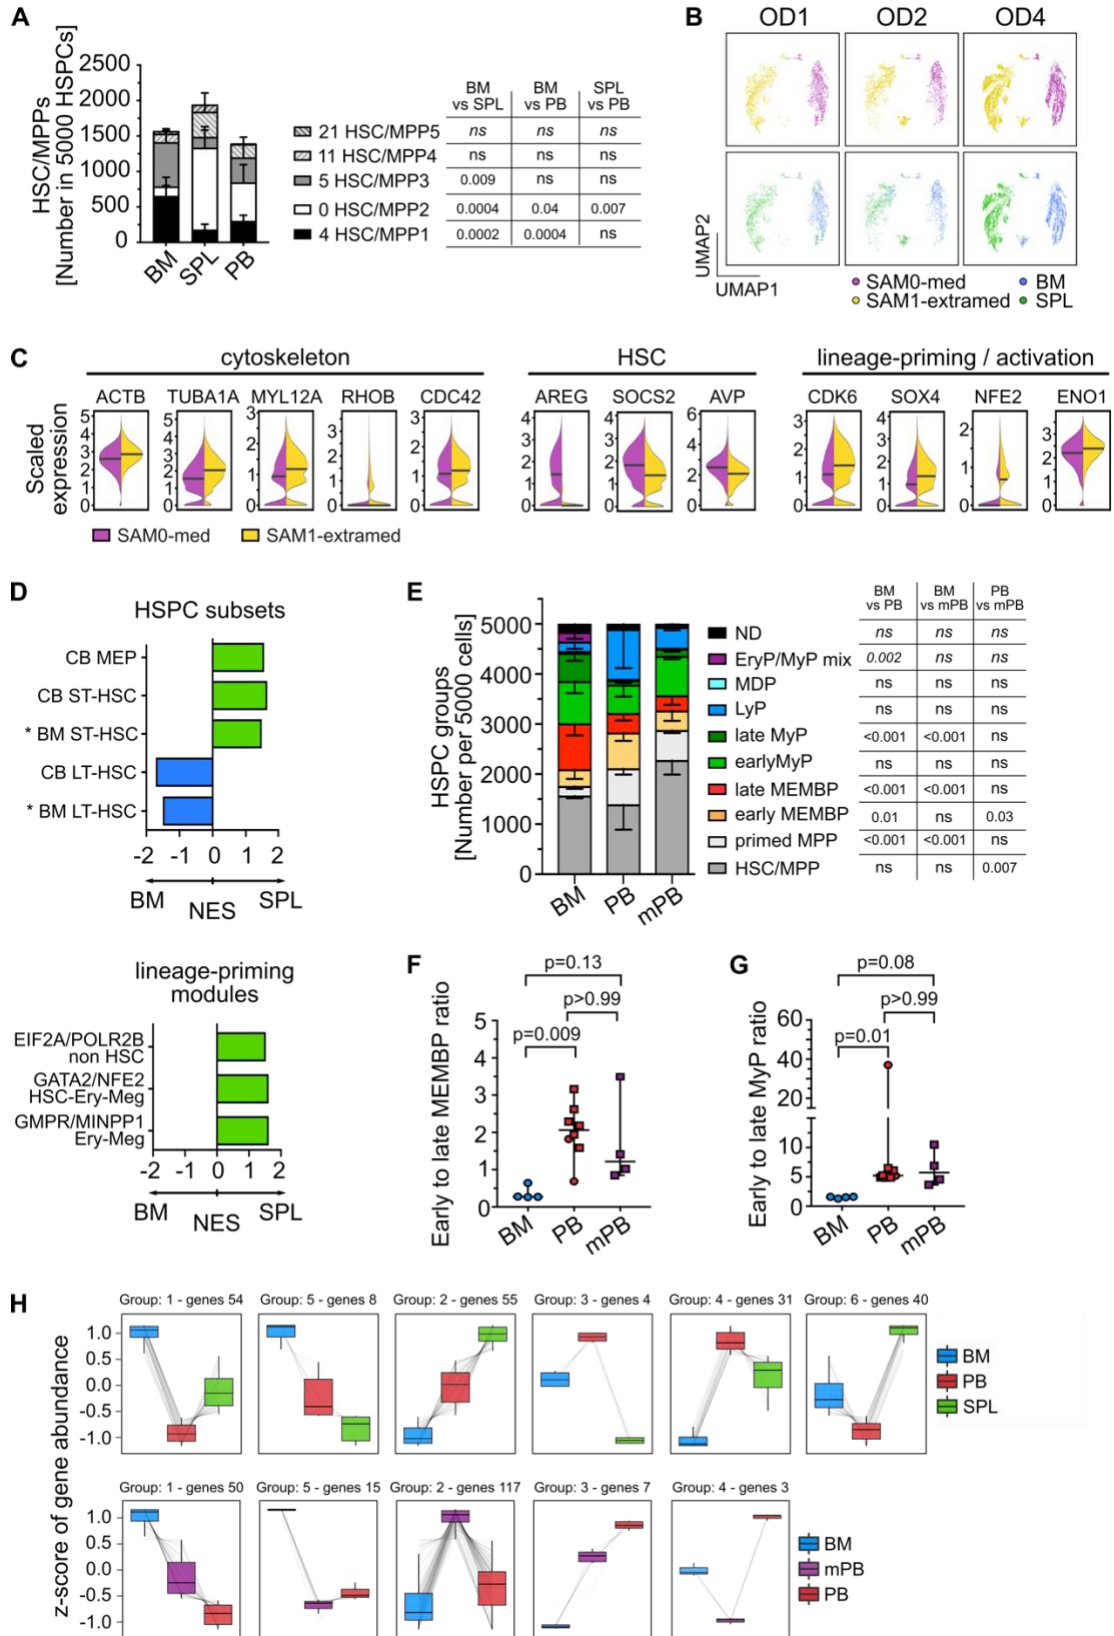

**Figure S5. Comparison of HSC/MPPs from BM and extramedullary hematopoietic tissues.** Related to Figure 4. **(A)** Composition of HSC/MPP clusters



comparing different tissues. **(B)** UMAPs colored by SAM clusters and tissue for each donor. **(C)** Split violin plots showing scaled expression values of selected genes related to cytoskeleton, HSC and lineage-priming genes differentially expressed (FDR<0.05) between SAM0-med and SAM1-extramed clusters. Line indicates median. **(D)** Phenotypic HSC/MPPs (CD19<sup>-</sup>CD34<sup>+</sup>CD38<sup>-</sup>CD45RA<sup>-</sup>) from BM and spleen of OD1 and OD2 were single-cell sorted and transcriptome was sequenced using the Smart-seq2 protocol. Bar graphs show all population-specific signatures (left, <sup>26,28</sup>, signature for BM HSCs unpublished) and lineage-priming modules (right, <sup>29</sup>) from pre-ranked GSEA analysis (FDR <0.05) comparing BM and spleen HSC/MPPs. **(E-G)** Analysis of scRNA-seq data integrating BMs and non-mobilized PBs (same as in Figure 2) with four mobilized PB (mPB) CD19<sup>-</sup>CD34<sup>+</sup> HSPCs (28,026 cells). **(E)** Relative composition of HSPC groups comparing BM, non-mobilized PB and mPB. **(F,G)** The ratio of early to late progenitors of the MEMB (F) or My (G) branch is shown. Median ± 95% confidence is shown. Kruskal-Wallis test with Dunn's multiple comparison. **(H)** Expression patterns for the key medullary and extramedullary signature genes comparing BM, non-mobilized PB and spleen (top panel) or BM, non-mobilized PB and mobilized PB (bottom panel). A,E) Mean ± SD is shown. One-way ANOVA with post hoc Tukey test, except for not normally distributed clusters (indicated in italic), for which a Kruskal-Wallis test with Dunn's multiple comparison was used. ns; p>0.05. SPL: spleen.

**Figure S6**

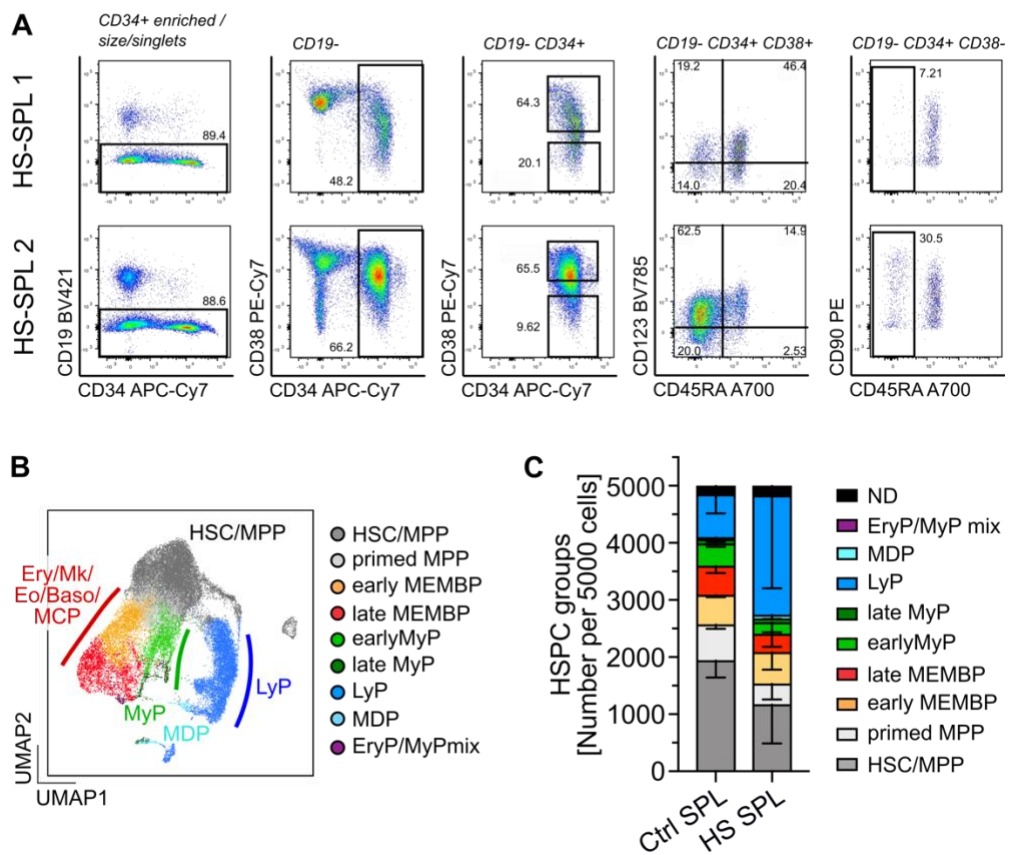

**Figure S6: scRNA-seq analysis of hereditary spherocytosis spleens.** Related to Figure 5. **(A)** Flow cytometry data from HSPC phenotyping of both hereditary spherocytosis (HS) spleen CD34<sup>+</sup> enriched samples. **(B)** UMAP after integration of 10x Genomics scRNA-seq data from two HS spleens (n=9,939 cells) with control spleens (same as in Figure 2). HSPC groups are indicated by different cluster colors. **(C)** HSPC group composition in control and HS spleens. Mean  $\pm$  SD is shown. SPL: spleen.

**Figure S7**

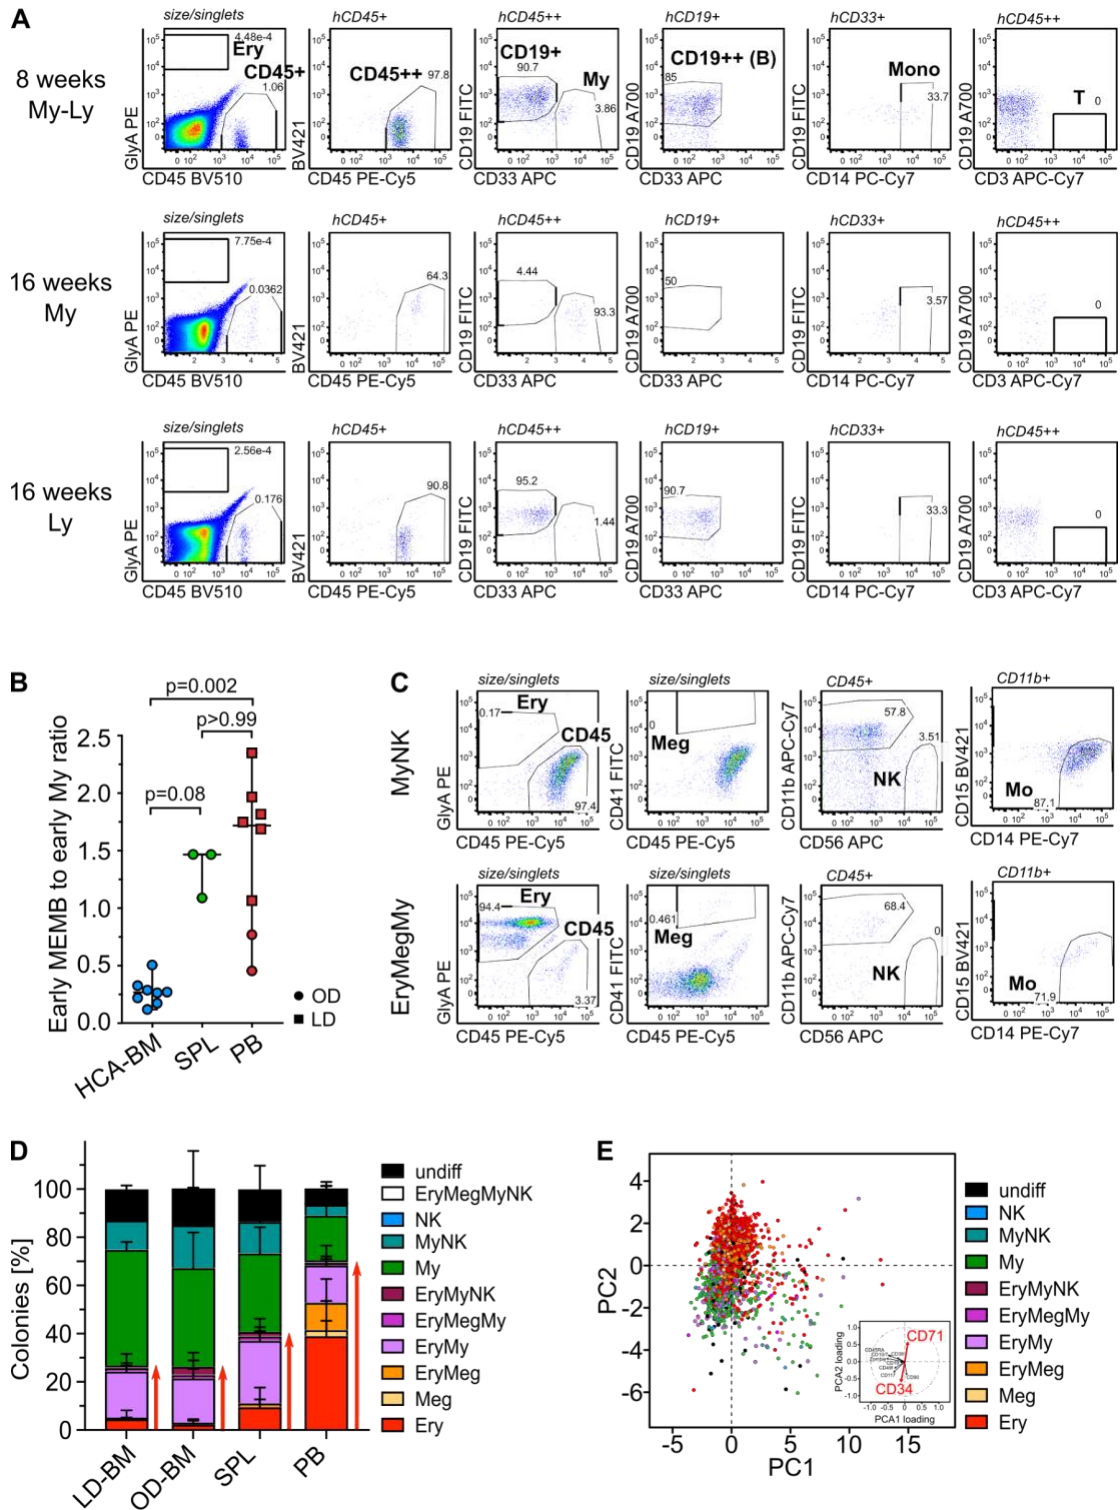

**Figure S7. Functional characterization of the phenotypic HSC/MPP pool from steady-state PB.** Related to Figure 6. **(A)** Representative examples of flow cytometry plots of human cell engraftment in NSG mice after 8 and 16 weeks of repopulation with HSC/MPPs from PB (My-Ly: Myelo-lymphoid; Ly: lymphoid; My: myeloid engraftment) using antibody panel (K). Within engrafted human leukocytes (CD45<sup>++</sup>, doubly labeled

by both hCD45 BV510 and hCD45 PE-Cy5 antibodies), CD19<sup>++</sup> B cells (B), CD33<sup>+</sup> myeloid cells (My), CD33<sup>+</sup>CD14<sup>+</sup> monocytes (Mono) and CD3<sup>+</sup> T cells (T) were distinguished. Erythrocytes (Ery) were identified by GlyA expression. This gating strategy was used for Figure 6A. **(B)** Ratio of early MEMB (sum cluster 2,12) to early My (sum cluster 6,9) progenitors in spleen and PB compared to the HCA BM reference<sup>31</sup>. Median  $\pm$  95% confidence interval is shown. Kruskal-Wallis; Dunn's multiple comparison test. **(C)** Two representative examples of the gating strategy used to determine lineage composition of colonies derived from single cells grown in medium supporting Ery, Meg, My and Ly differentiation. Colonies were defined as described in the methods. **(D)** Bar graphs show average colony composition for each tissue assessed by flow cytometry. Same data as in Figure 6C. BM from organ donors (OD-BM, n=496 single cells from 4 samples) and living donors (LD-BM, n=417 single cells from 3 samples) are shown separately. Red bar highlights all colonies containing Ery and/or Meg colonies as also quantified in Figure 6C. **(E)** Phenotypic HSC/MPPs from PB (n=2,164; 20 independent PBs) were index-sorted, recording the cell surface expression of known hematopoietic stem/progenitor markers for each (CD19, CD34, CD38, CD45RA, CD90, CD117, CD71, CD49f, CD10/CD7), and seeded into medium promoting simultaneous differentiation into myeloid (My), erythroid (Ery), megakaryocytic (Meg) and lymphoid (Ly, measured by growth of NK cell colonies) lineages<sup>2</sup>. Plot shows the principal component analysis (PCA) of the surface markers expression on phenotypic PB HSC/MPPs at the time of sort. Colors indicate the colony type produced by each single HSC/MPP. PCA loadings are shown in the lower right corner. LD: living donor, OD: organ donor, SPL: spleen.



**Figure S8. Characterization of CD71<sup>+</sup> HSC/MPPs.** Related to Figure 6. **(A)** Percentage of Meg colonies from CD71<sup>-</sup> and CD71<sup>+</sup> HSC/MPPs in MegaCult™ medium. n=3 PBs in 3 experiments. Two tailed paired t-test. **(B-C)** Single cell sorted CD71<sup>-</sup> (n=457 single cells; 5 independent PBs) and CD71<sup>+</sup> (n=1,005 single cells; 9 independent PBs) HSC/MPPs were grown in conditions optimized for Ery/Meg differentiation<sup>39</sup> over 6 experiments. **(B)** Representative examples for the gating strategy used to determine lineage composition of colonies. Colonies were defined as follows: Ery: CD45<sup>-</sup>GlyA<sup>+</sup> >30 cells, Meg: GlyA<sup>-</sup>CD41a<sup>+</sup>CD42b<sup>+</sup> >20 cells, My: CD45<sup>+</sup>CD11b<sup>+</sup> > 30 cells. **(C)** Colony types are shown as frequency of all seeded cells. Two-tailed Mann-Whitney test. **(D)** Smart-seq2 scRNA-seq data from CD71<sup>+</sup> PB HSC/MPPs was projected onto the HSC/MPP clusters of the 10x multitissue landscape. UMAP (left) shows the nearest neighbors for each single CD71<sup>+</sup> HSC/MPP (large dots) on the 10x HSC/MPP map (small dots). Bar graph shows the reference annotation for all CD71<sup>+</sup> HSC/MPPs in these projections. **(E)** Percentage PB CD71<sup>-</sup> HSC/MPPs, CD71<sup>+</sup> HSC/MPPs and CMP/MEPs in G<sub>0</sub> (Ki-67<sup>-</sup>DAPI<sup>-</sup>), G<sub>1</sub> (Ki-67<sup>+</sup>DAPI<sup>-</sup>) and S/G<sub>2</sub>/M (Ki-67<sup>+</sup>DAPI<sup>+</sup>) cell cycle phases as determined by flow cytometry. n=6 PBs over 2 experiments. Wilcoxon test. **(F)** Significantly enriched (FDR <0.05 by pre-ranked GSEA and NES >1.6 or <-1.6) HSC/MPP-specific gene signatures from<sup>28</sup> (right panel) and lineage-priming gene signatures from<sup>29</sup> (left panel) in CD71<sup>-</sup> and CD71<sup>+</sup> HSC/MPPs. Enrichment for population-specific signatures from<sup>26</sup> are shown in Table S4I. **(G)** Time to first division kinetics (excluding dead cells) in pro-differentiating cultures comparing MEPs (same as in supplemental Figure 4C, n=655 single cells from 6 donors) and CD71<sup>+</sup> HSC/MPPs (n=373 single from PB. Curve is least-squares sigmoid fit. Estimated time to first division (logEC50) is indicated by dashed grey lines. p is by extra sum of squares F-test. **(H)** Heatmap shows scaled expression values of indicated proteins measured in CD71<sup>-</sup> HSC/MPPs, CD71<sup>+</sup> HSC/MPPs and CMP/MEPs of 3 independent PBs by mass cytometry. **(I)** Colony types produced by CD71<sup>+</sup> HSC/MPPs (n=1,005 single cells; 9 independent PBs, same as in supplemental Figure 8C) and MEPs (n=556 single cells; 6 independent PBs) in conditions optimized for Ery/Meg differentiation<sup>39</sup> over 6 experiments. Two-tailed Mann-Whitney test. **(J)** Frequency of CD90<sup>hi</sup> cells in CD71<sup>-</sup> and CD71<sup>+</sup> PB HSC/MPPs. Median ± 95% confidence is shown. Paired two-tailed Wilcoxon test. **(K)** Representative examples of flow cytometry plots of human myelo-lymphoid (My-Ly) engraftment from CD71<sup>-</sup> PB HSC/MPPs in NSG mice at 4 and 8 weeks after transplantation (using antibody panel (M; 4 weeks and L; 8 weeks). Within engrafted human leukocytes (CD45<sup>++</sup>, doubly labeled by both hCD45 BV510 and hCD45 PE-Cy5 antibodies), CD19<sup>+</sup> B cells and

CD33<sup>+</sup> myeloid (My) cells were distinguished. Erythrocytes (Ery) were defined by GlyA and/or CD71 expression. This gating strategy was used for Figure 6H-I. **(L)** Representative examples of flow cytometry plots showing the proportion of CD71<sup>-</sup> (blue gates) and CD71<sup>+</sup> (red gates) phenotypic HSC/MPPs (CD19<sup>-</sup>CD34<sup>+</sup>CD38<sup>-</sup>CD45RA<sup>-</sup> cells) in BM and spleen. A,C,E,G,I) Mean  $\pm$  SD is shown. SPL: spleen.

**Figure S9**

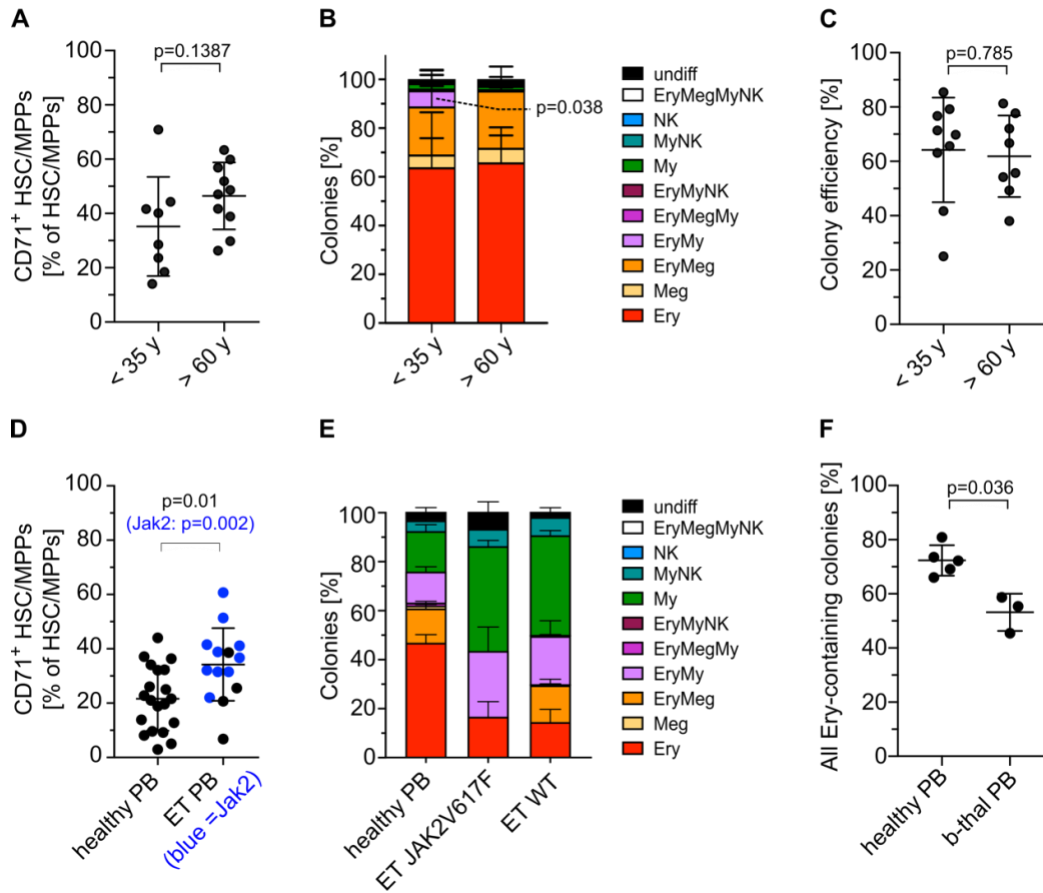

**Figure S9. Differentiation output of PB HSC/MPPs in age and disease.** Related to Figure 7. **(A)** Percentage of CD71<sup>+</sup> HSC/MPPs within the phenotypic HSC/MPP pool of PB from donors <35 years (n=8) and >60 years (n=10). **(B)** Colonies derived from young (<35 years, n=369 single cells from 6 samples) and aged (>60 years, n=209 single cells from 4 samples) CD71<sup>+</sup> HSC/MPPs isolated from non-mobilized PB. **(C)** Single cell differentiation assay (MEM) with PB HSC/MPPs from donors <35 years (n=942 single cells; 9 independent PBs) or >60 years (n=700 single cells; 8 independent PBs). Graph shows clonogenic efficiency calculated as the number of colonies per number of seeded cells. **(D)** Percentage of CD71<sup>+</sup> HSC/MPPs within the phenotypic HSC/MPP pool of PB from healthy donors (n=20) and ET patients (n=13). ET samples carrying the JAK2V617F mutation are highlighted in blue. **(E)** Colonies generated from ET PB HSC/MPPs were genotyped and divided into cells carrying the JAK2V617F mutation (n=35 cells, 3 samples) and wildtype cells (WT, n=180 cells, 3 samples). Same data as in Figure 7F. **(F)** Percentage of all erythroid-containing colonies derived from healthy control PB and b-thal PB. Same samples as in Figure 7G. A-F) Mean ± SD is shown. A,C) Two-tailed unpaired t-test. C,D,E,F) Mann-Whitney test.



Figure S10

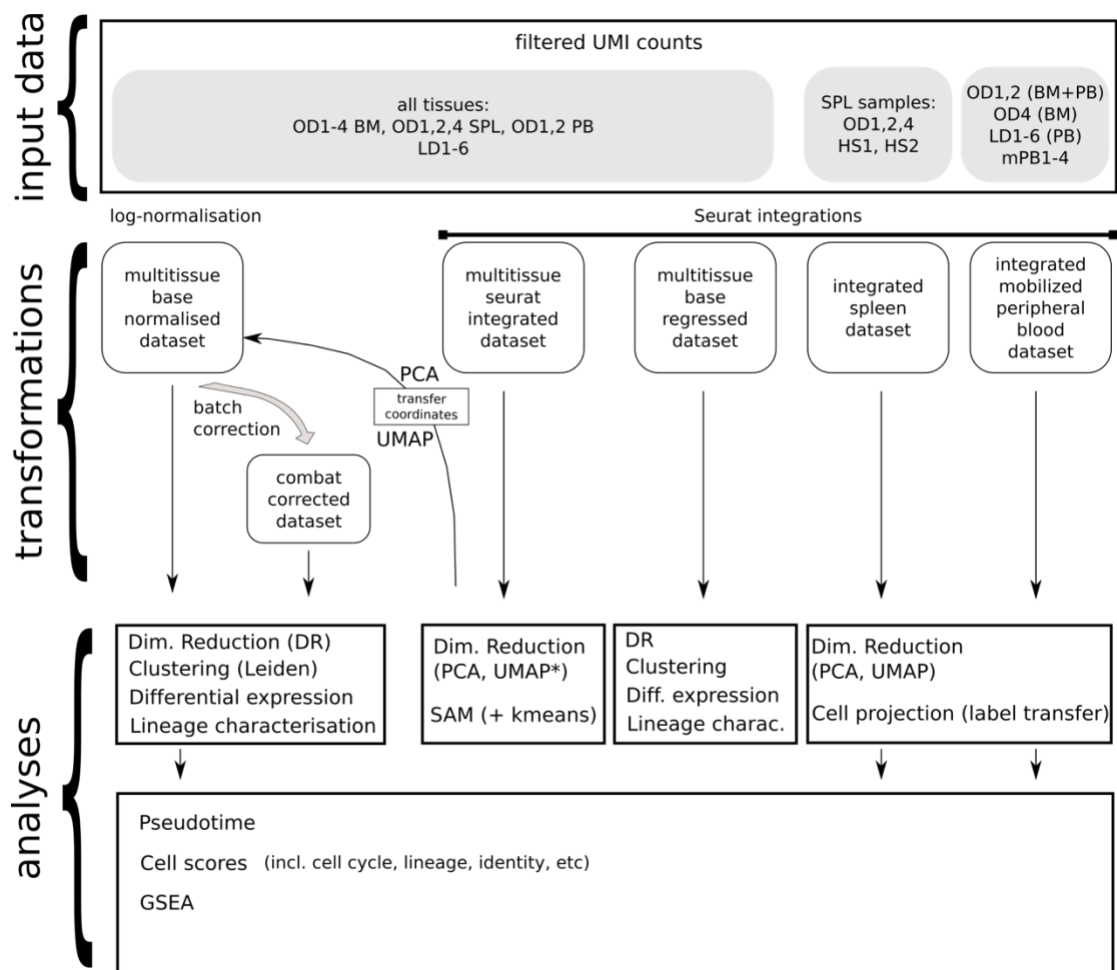

**Figure S10. Overview of the 10x mRNA analyses after QC filtering.** Grouping of samples (OD1-4 BM, OD1-2,4 SPL, OD1,2 PB, LD1-6 PB; OD1-2,4 SPL, HS1-2 SPL; OD1-2 BM+PB, OD4 BM, LD1-6 PB, mPB1-4) and the respective main pivotal data transformation points which are subsequently used as inputs to produce the listed analyses. The dimensionality reduction step used for the multi-tissue map is highlighted with an asterisk. OD: organ donor, LD: living donor, BM: bone marrow, PB: peripheral blood, mPB: mobilized peripheral blood, SPL: spleen.

**Figure S11**

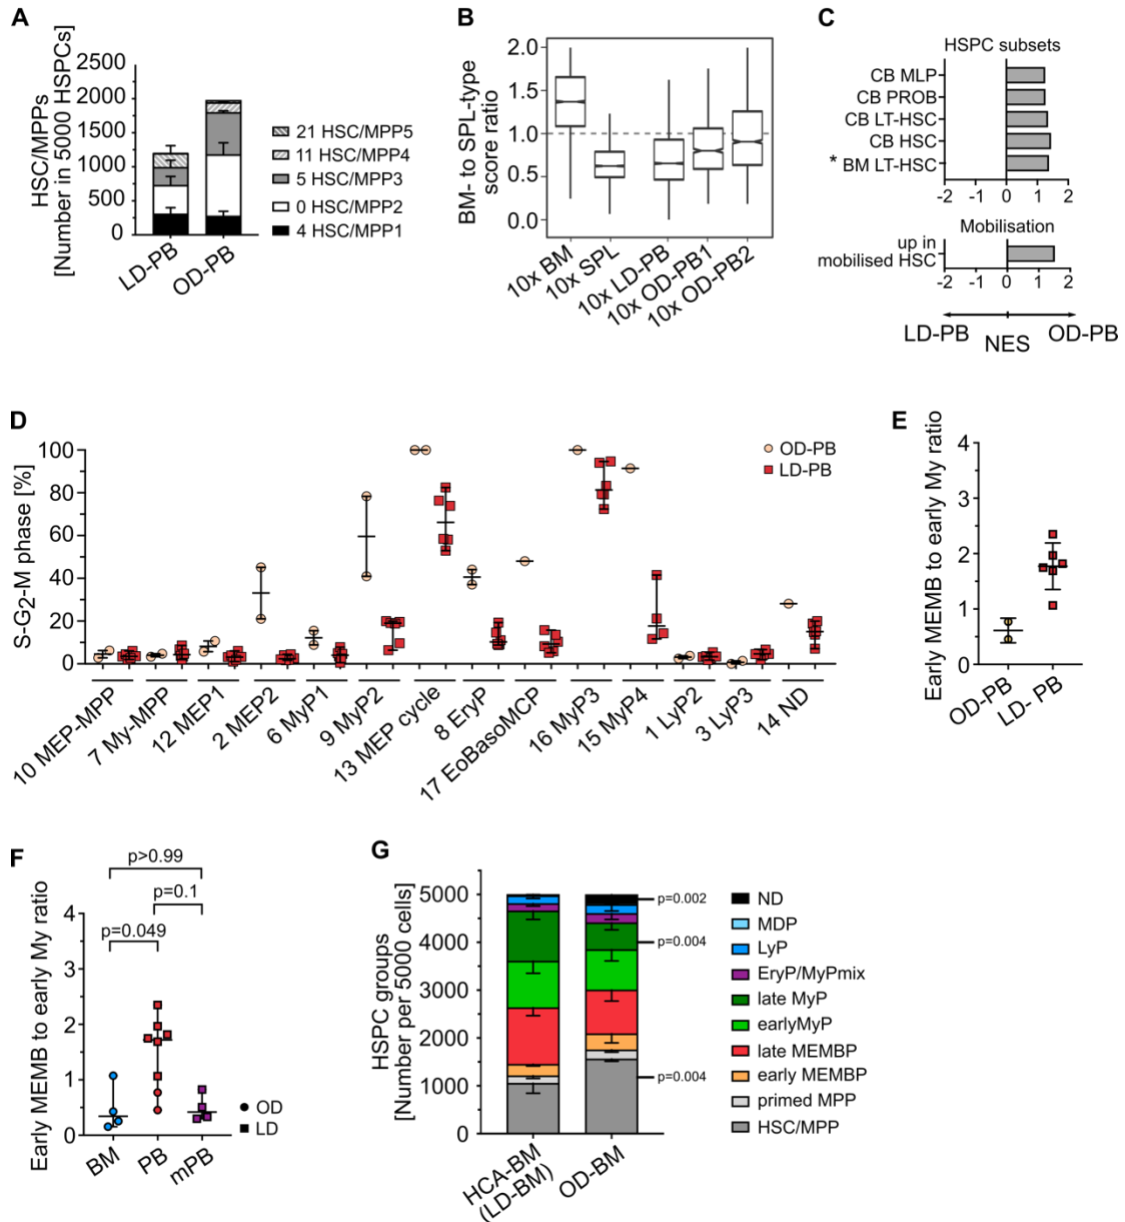

**Figure S11. Comparison of living donor samples with organ donor samples.**

Related to supplementary note 1. **(A)** Composition of HSC/MPP clusters comparing LD-PB (n=6) with OD-PB (n=2). **(B)** Ratio between BM- and SPL-type identity scores in LD-PB and two individual OD-PBs (OD-PB1 and OD-PB2). Notches indicate the 95% confidence interval of the median (middle line). **(C)** Bar graphs show significantly enriched gene sets (FDR <0.05, see Table S3q, S4n-o) in OD-PB compared to LD-PB using population-specific signatures (top, <sup>26,28</sup>, BM LT-HSC unpublished) and gene sets that are differentially regulated in mouse HSCs after treatment with mobilizing drugs (middle, <sup>30</sup>). **(D)** Percentage of cells in S-G2-M phase (assigned by cell cycle phase scoring as described by <sup>11</sup>) for each progenitor cluster comparing OD- and LD-PB **(E)** Ratio of early MEMBP to early MyP progenitors in OD- and LD-PB. **(F)** Ratio of

early MEMBP to early MyP progenitors in BM, non-mobilized PB (PB) and mobilized PB (mPB). Kruskal-Wallis test with Dunn's multiple comparison. **(G)** Comparison of BM from our multi-tissue landscape (OD-BM) to the benchmark HCA-BM reference1 (HCA-BM/LD-BM). Bar graph of the relative composition of HSPC groups are shown. Two-tailed Mann-Whitney test. A,G) Mean  $\pm$  SD is shown. D,E,F) Median  $\pm$  95% CI is shown. LD: living donor, OD: organ donor.

## REFERENCES FOR SUPPLEMENTAL MATERIAL

1. Stoeckius M, Hafemeister C, Stephenson W, et al. Simultaneous epitope and transcriptome measurement in single cells. *Nature Methods*. 2017;14(9):865–868.
2. Belluschi S, Calderbank EF, Ciaurro V, et al. Myelo-lymphoid lineage restriction occurs in the human haematopoietic stem cell compartment before lymphoid-primed multipotent progenitors. *Nature Communications*. 2018;9(1):.
3. Nestorowa S, Hamey FK, Sala BP, et al. A single-cell resolution map of mouse hematopoietic stem and progenitor cell differentiation. *Blood*. 2016;128(8):e20–e31.
4. Picelli S, Faridani OR, Björklund ÅK, et al. Full-length RNA-seq from single cells using Smart-seq2. *Nature Protocols*. 2014;9(1):171–181.
5. Zerbino DR, Achuthan P, Akanni W, et al. Ensembl 2018. *Nucleic Acids Res*. 2018;46(Database issue):D754–D761.
6. Wu TD, Nacu S. Fast and SNP-tolerant detection of complex variants and splicing in short reads. *Bioinformatics*. 2010;26(7):873–881.
7. Anders S, Pyl PT, Huber W. HTSeq—a Python framework to work with high-throughput sequencing data. *Bioinformatics*. 2015;31(2):166–169.
8. Brennecke P, Anders S, Kim JK, et al. Accounting for technical noise in single-cell RNA-seq experiments. *Nature Methods*. 2013;10(11):1093–1095.
9. Love MI, Huber W, Anders S. Moderated estimation of fold change and dispersion for RNA-seq data with DESeq2. *Genome Biol*. 2014;15(12):.
10. Leek JT, Johnson WE, Parker HS, Jaffe AE, Storey JD. The sva package for removing batch effects and other unwanted variation in high-throughput experiments. *Bioinformatics*. 2012;28(6):882–883.
11. Satija R, Farrell JA, Gennert D, Schier AF, Regev A. Spatial reconstruction of single-cell gene expression. *Nat Biotechnol*. 2015;33(5):495–502.
12. Anders S, Huber W. Differential expression analysis for sequence count data. *Genome Biology*. 2010;11(10):R106.
13. Heaton H, Talman AM, Knights A, et al. Souporecell: robust clustering of single-cell RNA-seq data by genotype without reference genotypes. *Nat Methods*. 2020;17(6):615–620.
14. Wolock SL, Lopez R, Klein AM. Scrublet: Computational Identification of Cell Doublets in Single-Cell Transcriptomic Data. *Cell Systems*. 2019;8(4):281–291.e9.
15. Wolf FA, Angerer P, Theis FJ. SCANPY: large-scale single-cell gene expression data analysis. *Genome Biol*. 2018;19:.
16. Stuart T, Butler A, Hoffman P, et al. Comprehensive Integration of Single-Cell Data. *Cell*. 2019;177(7):1888–1902.e21.
17. Jardine L, Webb S, Goh I, et al. Blood and immune development in human fetal bone marrow and Down syndrome. *Nature*. 2021;598(7880):327–331.
18. Mulè MP, Martins AJ, Tsang JS. Normalizing and denoising protein expression data from droplet-based single cell profiling. *bioRxiv*. 2021;2020.02.24.963603.
19. Coifman RR, Lafon S. Diffusion maps. *Applied and Computational Harmonic Analysis*. 2006;21(1):5–30.
20. McInnes L, Healy J, Melville J. UMAP: Uniform Manifold Approximation and Projection for Dimension Reduction. *arXiv:1802.03426 [cs, stat]*. 2018;
21. Jacomy M, Venturini T, Heymann S, Bastian M. ForceAtlas2, a Continuous Graph Layout Algorithm for Handy Network Visualization Designed for the Gephi Software. *PLoS One*. 2014;9(6):.
22. Robinson MD, McCarthy DJ, Smyth GK. edgeR: a Bioconductor package for differential expression analysis of digital gene expression data. *Bioinformatics*. 2010;26(1):139–140.

23. Haghverdi L, Büttner M, Wolf FA, Buettner F, Theis FJ. Diffusion pseudotime robustly reconstructs lineage branching. *Nat Methods*. 2016;13(10):845–848.
24. Tarashansky AJ, Xue Y, Li P, Quake SR, Wang B. Self-assembling manifolds in single-cell RNA sequencing data. *eLife*. 2019;8:.
25. Hie B, Bryson B, Berger B. Efficient integration of heterogeneous single-cell transcriptomes using Scanorama. *Nat Biotechnol*. 2019;37(6):685–691.
26. Laurenti E, Doulatov S, Zandi S, et al. The transcriptional architecture of early human hematopoiesis identifies multilevel control of lymphoid commitment. *Nat Immunol*. 2013;14(7):756–763.
27. Subramanian A, Tamayo P, Mootha VK, et al. Gene set enrichment analysis: A knowledge-based approach for interpreting genome-wide expression profiles. *Proceedings of the National Academy of Sciences*. 2005;102(43):15545–15550.
28. Laurenti E, Frelin C, Xie S, et al. CDK6 Levels Regulate Quiescence Exit in Human Hematopoietic Stem Cells. *Cell Stem Cell*. 2015;16(3):302–313.
29. Velten L, Haas SF, Raffel S, et al. Human haematopoietic stem cell lineage commitment is a continuous process. *Nature Cell Biology*. 2017;19(4):271–281.
30. Forsberg EC, Passegué E, Prohaska SS, et al. Molecular Signatures of Quiescent, Mobilized and Leukemia-Initiating Hematopoietic Stem Cells. *PLoS One*. 2010;5(1):.
31. Hay S, Ferchen K, Chetal K, Grimes HL, Salomonis N. The Human Cell Atlas Bone Marrow Single-Cell Interactive Web Portal. *Experimental Hematology*. 2018;68:51–61.
32. Itoh K, Tezuka H, Sakoda H, et al. Reproducible establishment of hemopoietic supportive stromal cell lines from murine bone marrow. *Exp. Hematol*. 1989;17(2):145–153.
33. Baxter EJ, Scott LM, Campbell PJ, et al. Acquired mutation of the tyrosine kinase JAK2 in human myeloproliferative disorders. *Lancet*. 2005;365(9464):1054–1061.
34. Hu Y, Smyth GK. ELDA: Extreme limiting dilution analysis for comparing depleted and enriched populations in stem cell and other assays. *Journal of Immunological Methods*. 2009;347(1):70–78.
35. Mimasaka S. Postmortem Cytokine Levels and the Cause of Death. *The Tohoku Journal of Experimental Medicine*. 2002;197(3):145–150.
36. Schwarz P, Custódio G, Rheinheimer J, et al. Brain Death-Induced Inflammatory Activity is Similar to Sepsis-Induced Cytokine Release. *Cell Transplant*. 2018;27(10):1417–1424.
37. Corr L, Grounds RM, Brown MJ, Whitwam JG. Plasma catecholamine changes during cardiopulmonary bypass: a randomised double blind comparison of trimetaphan camsylate and sodium nitroprusside. *Heart*. 1986;56(1):89–93.
38. Iyer A, Chew HC, Gao L, et al. Pathophysiological Trends During Withdrawal of Life Support: Implications for Organ Donation After Circulatory Death. *Transplantation*. 2016;100(12):2621–2629.
39. Psaila B, Barkas N, Iskander D, et al. Single-cell profiling of human megakaryocyte-erythroid progenitors identifies distinct megakaryocyte and erythroid differentiation pathways. *Genome Biology*. 2016;17:83.
